# Supplementary material for: Sertoli cell-only phenotype and scRNA-seq reveal hnRNPU as a regulator required for spermatogonial stem cell pool establishment in mice
Source: Research Square preprint supplement (doi:10.21203/rs.3.rs-2254778/v1), 2022-11-11
Supplement: Supplementary file 1 [file 3f58cabc4bfd5b3fa6069c8a.xlsx]

## Sheet: Sheet1
Table S2. The differentially alternative spliced transcripts identified from P4 testes in hnRNPU cKO mice were determined by RNA-Seq.
Gene_name	AS_type	AS_feature	P_value	FDR
Rnf169	MXE	99942958_99943105_99955466_99955540_99935161_99935280_99979971_99980448	0.0495012	0.48197
Zc3h14	MXE	98752777_98752892_98756184_98756225_98747479_98747522_98757008_98757204	0.0292911	0.39756
Sgms1	MXE	32142745_32142863_32159523_32160363_32129540_32129694_32223508_32223590	0.00547741	0.168633
Slc25a46	MXE	31597038_31597095_31600131_31600232_31580167_31583769_31602722_31602800	0.0462572	0.468406
Sema4b	MXE	80198518_80198770_80212795_80212959_80186840_80186991_80213262_80213325	0.0154319	0.304062
Ccdc58	MXE	36085016_36085163_36089900_36089960_36071659_36072137_36091833_36092118	0.00206001	0.0905453
Msh2	MXE	87678207_87678362_87682530_87682677_87672329_87672806_87685436_87685586	0.00498589	0.165517
Mapk10	MXE	102976354_102976426_102987202_102987274_102966445_102966628_102989619_102989785	0.001063	0.0660216
Poldip3	MXE	83135293_83135389_83137467_83137554_83133146_83133326_83138131_83138522	0.0292155	0.39756
Bre	MXE	31820477_31820672_31831084_31831159_31785577_31785672_31901054_31901164	0.0241447	0.377269
4833439L19Rik	MXE	54564184_54564272_54564514_54564621_54559197_54559324_54565181_54565435	0.00351474	0.132126
Mapk14	MXE	28737010_28737090_28740679_28740759_28728903_28728975_28741787_28741866	3.23e-05	0.00485709
Eif5a	MXE	69919448_69919478_69920340_69920434_69919150_69919336_69921162_69921386	0.025943	0.384037
Nr1d2	MXE	18216649_18216794_18219967_18220056_18214873_18215493_18221986_18222253	0.00180958	0.0821496
Vps50	MXE	3536831_3536972_3545509_3545642_3533471_3533570_3551012_3551104	0.0207113	0.355185
Osbpl1a	MXE	12841183_12841346_12871077_12871184_12819504_12819661_12882195_12882277	0.00970908	0.231943
Man2c1	MXE	57139869_57139964_57140198_57140303_57139610_57139708_57140381_57140538	0.0342919	0.411647
Ddx31	MXE	28886890_28887002_28892378_28892541_28881142_28881224_28904588_28905571	0.0258369	0.384037
2600014E21Rik	MXE	75302676_75302759_75304278_75304346_75301642_75301666_75305450_75305520	0.0198505	0.34894
Crem	MXE	3276693_3276729_3287903_3288092_3273421_3273578_3295039_3295182	0.0119123	0.264217
Inhba	MXE	16014450_16014532_16017181_16017683_16012199_16012386_16026242_16027188	0.000103026	0.0121923
Thoc2	MXE	41879885_41879937_41881908_41882000_41873881_41873952_41897791_41897850	0.0316764	0.401949
Casc4	MXE	121906697_121906778_121925560_121925728_121905929_121906071_121933477_121935866	0.000614237	0.046181
Slc35b3	MXE	38944499_38944654_38954108_38954230_38943058_38943166_38955648_38955936	0.0241653	0.377269
Pigh	MXE	79083615_79083699_79085646_79085856_79080672_79082496_79089439_79089670	0.000522575	0.0414722
Tmem38a	MXE	72581184_72581272_72584699_72584817_72579562_72579719_72585861_72587282	6.87e-05	0.00981251
Osbpl1a	MXE	12892166_12892289_12898202_12898301_12882195_12882277_12905022_12905086	0.0170926	0.315056
Epn2	MXE	61521658_61521874_61522405_61522492_61517248_61519707_61523028_61523193	0.00572539	0.168633
Acrbp	MXE	125051242_125051360_125053489_125053952_125050846_125050941_125054672_125054805	0.00193287	0.0862845
Cpq	MXE	33381335_33381447_33466625_33466717_33302339_33302547_33497162_33497364	0.00860596	0.223227
Zfp961	MXE	71965793_71965920_71966099_71966160_71951070_71951160_71967898_71970333	0.000598	0.0461753
Nme6	MXE	109839607_109839710_109841475_109841515_109833041_109833295_109841926_109842087	0.0257919	0.384037
Cenpo	MXE	4231515_4231682_4233530_4233657_4217207_4217322_4233751_4234294	0.0120147	0.264217
Klf12	MXE	99942033_99942096_99987430_99987566_99900081_99900239_100022621_100023168	0.0388724	0.428797
Dda1	MXE	71472194_71472246_71473774_71473836_71472036_71472117_71474487_71476098	0.0311419	0.401949
Gm11837	MXE	14936440_14936539_14942199_14942275_14930660_14930770_14947438_14947545	0.000493746	0.0403037
Ccdc152	MXE	3282817_3282945_3292379_3292444_3281022_3281106_3293852_3293921	0.0213832	0.355185
Rhbdl3	MXE	80302663_80302687_80319557_80319716_80300911_80301271_80323358_80323583	0.00227193	0.0942484
9230114K14Rik	MXE	52192917_52192978_52194800_52194890_52190712_52190937_52196892_52197023	0.0322034	0.401949
Stim2	MXE	54053375_54053506_54075279_54075394_53998498_53999034_54102574_54102686	0.0338826	0.408449
Napg	MXE	62980465_62980533_62982618_62982703_62977835_62978024_62983373_62983391	0.0456162	0.463792
Mro	MXE	73876682_73876838_73877429_73877537_73873223_73873406_73877844_73878730	0.000106688	0.0121923
Cab39l	MXE	59526755_59526815_59528841_59528907_59519565_59519734_59539061_59539205	0.00623142	0.177074
Cdkl2	MXE	92037167_92037362_92039237_92039436_92033578_92033757_92042798_92043041	0.00144538	0.0763404
Ttc8	MXE	98943824_98943914_98946568_98946613_98943461_98943621_98957280_98957366	0.0211533	0.355185
Gas5	MXE	161035751_161035804_161035982_161036244_161035187_161035194_161036548_161036579	3.81e-07	7.78e-05
Gas5	MXE	161035751_161035804_161035982_161036014_161034928_161035194_161036207_161036244	6.83e-06	0.00122039
Tex264	MXE	106681867_106682163_106684928_106684995_106673516_106673738_106685834_106685915	0.037259	0.425338
Arhgap42	MXE	9155302_9155364_9180026_9180122_9115689_9115761_9238625_9239101	0.00169083	0.0821496
Gas5	MXE	161035982_161036014_161036207_161036579_161035751_161035804_161036819_161036852	0	0
Gas5	MXE	161035982_161036014_161036207_161036244_161035751_161035804_161036548_161036579	0	0
D430042O09Rik	MXE	125851936_125852145_125854559_125854638_125850298_125851003_125860527_125860705	0.00146716	0.0763404
Rapgef6	MXE	54552789_54552873_54561324_54561394_54546372_54546429_54568352_54568496	0.0397579	0.431123
0610007P14Rik	MXE	85819478_85819569_85822087_85822248_85816315_85816434_85824470_85824522	0.0316173	0.401949
Amhr2	MXE	102452148_102452263_102452744_102452892_102447230_102447461_102453031_102453168	0.0122999	0.264217
Firre	MXE	50577870_50578024_50581402_50581556_50573223_50573351_50584678_50584847	0.0263742	0.385919
Firre	MXE	50603438_50603525_50608686_50608814_50600743_50600898_50612704_50612850	0.00105481	0.0660216
Firre	MXE	50603438_50603525_50615360_50615515_50600743_50600898_50626436_50626509	0.00260144	0.103226
Zfp862-ps	MXE	48514151_48514326_48525023_48525122_48511814_48512512_48527444_48527549	0.00314065	0.121254
Tjap1	MXE	46271799_46271929_46282345_46282439_46264882_46264978_46282959_46283026	0.0333816	0.405835
1500009L16Rik	MXE	83757444_83757480_83758133_83758213_83737908_83737933_83759592_83759630	0.0012285	0.0731214
Aaas	MXE	102345576_102345675_102346486_102346533_102344088_102344232_102346677_102346769	0.0243835	0.378606
Prkdc	MXE	15829615_15829820_15831270_15831338_15816750_15816894_15833675_15833896	0.00139228	0.0763404
Tmem164	MXE	142805989_142806068_142832500_142832601_142770966_142771033_142834184_142838238	0.0213808	0.355185
Map4	MXE	110071025_110071139_110072612_110072705_110068692_110068985_110078002_110078084	0.0167307	0.310387
E130307A14Rik	MXE	39655839_39655929_39681472_39681549_39654464_39654688_39731737_39732006	0.00566097	0.168633
Mpp7	MXE	7379988_7380069_7403185_7403356_7356141_7356235_7439568_7439633	0.00209514	0.090694
Fam13c	MXE	70448757_70448814_70451026_70451228_70440925_70441075_70477153_70477272	0.0103297	0.240823
Tnk2	MXE	32669386_32669539_32669952_32670230_32668220_32668442_32670791_32670918	0.00010285	0.0121923
Entpd6	MXE	150753009_150753333_150756042_150756119_150749041_150749233_150758742_150758886	0.0255881	0.384037
Lsm14b	MXE	180031360_180031528_180031793_180031871_180027899_180028035_180032060_180032222	0.0222836	0.359263
Gas5	MXE	161036819_161036852_161037287_161037315_161036207_161036244_161037504_161037547	0	0
Gas5	MXE	161036207_161036244_161036819_161036852_161035982_161036014_161037287_161037315	0	0
Gas5	MXE	161036207_161036244_161036548_161036579_161035982_161036014_161036819_161036852	0	0
Gas5	MXE	161035982_161036014_161036548_161036579_161035751_161035804_161036819_161036852	0	0
Gas5	MXE	161035982_161036244_161036548_161036579_161035751_161035804_161036819_161037315	2.03e-10	6.44e-08
Lima1	MXE	99826791_99826837_99843674_99843823_99819493_99819958_99875332_99875428	0.0253177	0.384037
Pip4k2a	MXE	18872283_18872430_18889051_18889204_18866111_18866150_18906228_18906325	0.000156139	0.0171573
Traf7	MXE	24513898_24513932_24514124_24514217_24513192_24513376_24516504_24516599	0.0385974	0.427866
Rcc1	MXE	132337730_132337910_132338050_132338238_132335716_132335813_132339924_132340006	0.0146297	0.294345
Abcc1	MXE	14396350_14396476_14403989_14404051_14393952_14394090_14405013_14405145	0.0163129	0.310387
Bche	MXE	73648636_73648803_73700571_73702099_73635807_73640041_73708134_73708415	0.0407696	0.435709
Hexdc	MXE	121214759_121214924_121216892_121217076_121213982_121214070_121218087_121218159	0.0281182	0.391871
Taf13	MXE	108572879_108572958_108578115_108578213_108571698_108571748_108581006_108583222	0.000771519	0.0551058
Dnm2	MXE	21478898_21479037_21480406_21480545_21478280_21478348_21481332_21481419	0.00103366	0.0660216
Zfp512b	MXE	181590052_181590181_181590469_181590612_181589372_181589959_181590859_181590985	0.037507	0.425338
Sdhc	MXE	171135992_171136156_171138693_171138755_171127164_171129905_171143557_171143659	0.00159871	0.0801318
Zfp410	MXE	84329801_84329952_84332934_84333024_84327278_84327470_84337615_84337741	0.0478303	0.475934
Msi2	MXE	88716509_88716594_88717289_88717371_88712437_88712479_88717704_88717745	0.0386383	0.427866
Cyth4	MXE	78602692_78602775_78604635_78604700_78597046_78597219_78605846_78605913	0.00815636	0.213786
Col4a5	MXE	141658531_141658540_141664675_141664684_141656684_141656870_141666841_141666975	0.00935099	0.22834
Ccdc149	MXE	52420731_52420839_52435697_52435736_52405975_52406092_52439058_52439220	0.0062959	0.177074
Gas5	MXE	161036819_161036852_161037504_161038037_161036207_161036244_161038224_161038272	4.2e-09	1.09e-06
Gas5	MXE	161036819_161037315_161037504_161038037_161036207_161036244_161038224_161038272	2.04e-09	5.82e-07
U2af1	MXE	31651645_31651712_31652501_31652568_31648844_31648894_31654978_31655066	6.35e-07	0.000120889
Fto	MXE	91485158_91485278_91522771_91522896_91474308_91474452_91666281_91668439	9.28e-05	0.0120556
Pla2g4a	MXE	149922054_149922136_149932657_149932756_149902293_149902442_149961190_149961290	0.00459965	0.156443
Sp100	MXE	85681085_85681139_85691974_85692049_85679058_85679109_85694258_85694309	0.0298991	0.39756
Ino80	MXE	119454055_119454217_119456384_119456452_119451329_119451450_119456571_119456741	0.00514129	0.166917
Gm37240	MXE	84509807_84509982_84515632_84515790_84496425_84497891_84519481_84519703	0.00882907	0.223227
2610020H08Rik	MXE	119801229_119801356_119802740_119802837_119799564_119799677_119805142_119805286	0.0017665	0.0821496
Hs6st2	MXE	51428657_51428744_51471373_51471406_51387211_51390361_51679889_51680408	0.0141012	0.289382
Metap1d	MXE	71522532_71522630_71523801_71523849_71515636_71515800_71524716_71524795	0.000388963	0.0347271
Hdgfrp3	MXE	81900284_81900423_81905559_81905636_81893798_81893945_81933938_81934473	0.0414391	0.435709
Kifc1	MXE	33885167_33885218_33885848_33885902_33884588_33884986_33886575_33886675	0.0385286	0.427866
Metap1d	MXE	71515636_71515800_71522532_71522630_71512125_71512168_71523801_71523849	0.00632184	0.177074
Calml4	MXE	62858241_62858272_62871265_62871454_62858103_62858161_62875476_62875921	0.00117807	0.0716118
Txndc11	MXE	11104565_11104659_11116794_11116924_11091585_11091786_11122669_11122767	0.000383687	0.0347271
Cetn4	MXE	37309936_37310065_37310292_37310439_37309344_37309482_37312356_37312446	0.0162541	0.310387
Zbtb8os	MXE	129343120_129343173_129344211_129344248_129341740_129341823_129346803_129349871	0.0167275	0.310387
Tmem219	MXE	126896748_126896938_126897025_126897227_126891602_126891832_126898223_126898276	0.0416341	0.435709
Tfdp2	MXE	96273865_96273942_96290579_96290627_96223093_96223198_96294964_96295127	0.0132538	0.276396
Cep152	MXE	125569554_125569651_125571668_125571833_125566532_125566689_125576713_125576855	0.00491895	0.165334
Lmbr1	MXE	29258678_29258755_29263394_29263475_29258057_29258135_29287390_29287463	0.00869089	0.223227
Col25a1	MXE	130474807_130474867_130475592_130475664_130439312_130439339_130476368_130476476	0.00294358	0.115203
Slc41a3	MXE	90633610_90633755_90635249_90635396_90626379_90626451_90636856_90637001	0.0207976	0.355185
Mmaa	MXE	79278201_79278324_79281176_79281654_79274103_79274274_79294913_79294937	0.025603	0.384037
Utp20	MXE	88751344_88751532_88752906_88753039_88750651_88750723_88753635_88753767	0.00181149	0.0821496
Blvra	MXE	127082931_127083050_127085962_127086082_127080529_127080658_127086844_127086942	0.033338	0.405835
4833439L19Rik	MXE	54559197_54559324_54564184_54564272_54556526_54556651_54564514_54564621	0.00403515	0.143843
Timm23	MXE	32189143_32189254_32191341_32191400_32180161_32180670_32193402_32193487	0.00390284	0.142954
Eri3	MXE	117552967_117553043_117564620_117564898_117550364_117550730_117582599_117582716	0.0366023	0.425338
Nkain4	MXE	180943740_180943821_180944076_180944214_180943029_180943227_180954570_180954699	0.0103334	0.240823
Fshr	MXE	89045070_89045145_89097309_89097381_89001894_89001963_89200460_89200612	0.000960692	0.0638302
Uqcc1	MXE	155901297_155901355_155921634_155921727_155887108_155887217_155930012_155930310	0.0206068	0.355185
Csnk1g1	MXE	65950015_65950064_65958328_65958721_65908985_65909168_65973478_65973519	0.0054112	0.168633
Actn1	MXE	80170182_80170248_80170685_80170766_80168857_80169016_80171728_80171875	2.82e-05	0.00447371
Tdrd9	MXE	112027094_112027148_112034581_112034682_112026252_112026297_112036353_112036527	0.0471851	0.471468
Zmym6	MXE	127105273_127105446_127106575_127106723_127104270_127104421_127108547_127108715	0.0300617	0.397622
Mrpl55	MXE	59204174_59204255_59204555_59204757_59202504_59202659_59205648_59206002	0.033254	0.405835
Bcl2l13	MXE	120865567_120865724_120870765_120870835_120862854_120862962_120876202_120876346	0.0271268	0.386767
Trmt11	MXE	30591020_30591102_30594114_30594188_30590842_30590935_30597739_30597805	0.0393729	0.430078
Dock6	MXE	21825782_21825875_21829473_21829578_21825434_21825530_21830213_21830377	2.82e-07	6.2e-05
Sp3	MXE	72978897_72979029_72979486_72979632_72970154_72971514_72980249_72980446	0.0212571	0.355185
Tmbim6	MXE	99393694_99393730_99399656_99399871_99392985_99393040_99401579_99401663	0.0265489	0.385919
Trmt2b	MXE	134266260_134266315_134267330_134267561_134263726_134263861_134276845_134276982	2.7e-05	0.00447371
Ube3a	MXE	59240966_59241033_59243349_59243469_59228801_59229271_59247172_59247217	0.000279294	0.0275153
Ccdc57	MXE	120861137_120861269_120866554_120866676_120860400_120860626_120873585_120873799	0.00611973	0.177074
AI413582	MXE	27564384_27564410_27564561_27564750_27564148_27564254_27565659_27565732	0.0276033	0.387861
Taf2	MXE	55031045_55031155_55034162_55034232_55028317_55028547_55036517_55036657	0.0003239	0.0308461
Casp2	MXE	42273916_42274045_42276694_42276785_42269279_42269456_42279776_42279926	0.039245	0.430078
Nt5m	MXE	59852790_59852891_59860749_59860810_59848072_59848372_59874552_59874667	0.0161812	0.310387
Txndc11	MXE	11104565_11104659_11116794_11116924_11093815_11093928_11122669_11122767	0.00367846	0.136485
Osbpl8	MXE	111233552_111233690_111255687_111255758_111224671_111224708_111263179_111263257	0.00538675	0.168633
B9d1	MXE	61507627_61507739_61509071_61509168_61506343_61506412_61509469_61509532	0.0362456	0.425338
Afmid	MXE	117835502_117835581_117835665_117835807_117835144_117835242_117836407_117836512	0.0217531	0.357304
Ifi27	MXE	103437389_103437524_103437675_103437705_103436562_103436682_103439400_103439562	0.0316504	0.401949
Tha1	MXE	117871011_117871100_117871603_117871687_117870434_117870620_117873170_117873459	0.00253987	0.102203
Oard1	MXE	48411263_48411408_48414225_48414284_48410013_48410372_48415220_48415333	0.00438649	0.15099
Nacc2	MXE	26062191_26062297_26064453_26064618_26061572_26061670_26089542_26090482	0.00326434	0.12435
Cda	MXE	138343506_138343564_138351183_138351295_138338527_138339000_138367789_138367992	0.0157632	0.308463
Galnt7	MXE	57542511_57542694_57542834_57543017_57540019_57540137_57545328_57545408	0.00738634	0.202911
Rnf14	MXE	38300428_38300590_38307864_38308395_38296634_38296798_38309484_38309713	0.0333329	0.405835
Setx	MXE	29133921_29134031_29139219_29139439_29130179_29130390_29140268_29140388	0.0131354	0.27594
Rps6kc1	MXE	190844486_190844602_190871591_190871951_190799012_190800581_190885333_190885427	0.0348495	0.414854
Gm28285	A5SS	35557336_35557391_35557336_35557369_35577557_35577619	0.00035529	0.0108193
D16Ertd472e	A5SS	78576190_78576657_78576390_78576657_78575920_78576054	5.03e-05	0.00193775
Firre	A5SS	50580580_50580949_50580812_50580949_50577870_50578024	0.0291646	0.224568
Gas5	A5SS	161035982_161036244_161035982_161036014_161036819_161037315	0.000421531	0.0108193
Gas5	A5SS	161036207_161036579_161036207_161036244_161036819_161036852	0	0
Tfpt	A5SS	3620746_3620983_3620776_3620983_3620323_3620474	0.00236534	0.0331147
Trnt1	A5SS	106769165_106769256_106769165_106769191_106769829_106770003	0.0203991	0.174526
Ska1	A5SS	74207529_74207818_74207593_74207818_74206788_74206884	4.39e-06	0.000338337
9230114K14Rik	A5SS	52192917_52193596_52192917_52192978_52194800_52194890	0.0187056	0.169451
Gm28036	A5SS	156098184_156098372_156098229_156098372_156079338_156079464	0.0252187	0.204404
Slc39a11	A5SS	113463950_113464095_113463971_113464095_113369727_113369898	0.0498111	0.330144
Pum1	A5SS	130765920_130766055_130765920_130766049_130768815_130768953	0.00147814	0.0252927
Hps1	A5SS	42766685_42766833_42766709_42766833_42766129_42766216	0.000801114	0.0176245
Pabpc4	A5SS	123295201_123295321_123295201_123295273_123295749_123295836	0.00208744	0.0321466
Mbd6	A3SS	127284042_127284215_127284042_127284212_127284334_127284485	0.00941553	0.167126
Heph	A3SS	96497847_96498056_96497973_96498056_96486226_96486358	1.01e-05	0.000955219
Cdkl3	A3SS	52004909_52005092_52004912_52005092_52004240_52004417	0.000118968	0.0084467
Zmiz2	A3SS	6396231_6396434_6396327_6396434_6395757_6395872	0.0429874	0.436015
Baiap2	A3SS	119996888_119997090_119997008_119997090_119996522_119996747	0.0239511	0.295743
Ptpn11	A3SS	121144529_121144696_121144529_121144684_121149102_121149234	0.00160271	0.0505745
Ralgds	A3SS	28542854_28542950_28542890_28542950_28542289_28542483	0.00265399	0.0668669
0610010K14Rik	A3SS	70235205_70235468_70235205_70235464_70236023_70236211	3.19e-06	0.000453385
Rtel1	A3SS	181355309_181355552_181355327_181355552_181355008_181355125	0.00278285	0.0668669
Trmt1	A3SS	84689631_84689908_84689707_84689908_84688865_84689376	0.000239401	0.0113316
Chfr	A3SS	110158798_110158918_110158801_110158918_110154836_110154982	0.0237137	0.295743
Ctc1	A3SS	69031410_69031604_69031413_69031604_69031099_69031189	0.00305599	0.0668669
Cd36	A3SS	17828774_17828984_17828774_17828981_17829455_17829549	0.000176952	0.0100509
Adamts7	A3SS	90192898_90194269_90193024_90194269_90192380_90192594	0.0218378	0.295743
Vegfb	A3SS	6985360_6985596_6985360_6985495_6985804_6985840	0.0467698	0.458022
Gnas	A3SS	174341649_174341707_174341652_174341707_174334211_174334284	0.00306081	0.0668669
Pus10	A3SS	23667277_23667414_23667287_23667414_23666006_23666453	0.035988	0.393099
Gm12963	A3SS	130027966_130028346_130027966_130028058_130037812_130037882	0.0347726	0.393099
Lipa	A3SS	34524737_34524846_34524737_34524842_34527365_34527474	0.0219626	0.295743
Alas2	A3SS	150552958_150553081_150553003_150553081_150552148_150552344	0.0138847	0.21907
Prickle1	A3SS	93512449_93512636_93512449_93512633_93595693_93595891	0.030449	0.360313
Tmem175	A3SS	108638236_108638490_108638272_108638490_108629831_108629900	0.00629147	0.119119
Cacna2d2	A3SS	107527147_107527236_107527153_107527236_107526936_107527046	0.00159131	0.0505745
Pknox2	SE	36987167_36987272_36968377_36968486_37083206_37083276	0.00031202	0.0267603
Rusc2	SE	43414627_43416718_43381978_43382199_43421604_43422249	0.000603353	0.0429305
Snx11	SE	96774440_96774495_96773135_96773222_96776967_96777061	0.0378568	0.591803
Rundc3b	SE	8494783_8494905_8490333_8492589_8520858_8521016	0.00207652	0.0950324
Mro	SE	73876682_73876838_73873223_73873406_73877429_73877537	2.72e-05	0.00592581
Fuz	SE	44898502_44898700_44897519_44897624_44898775_44898871	0.0492509	0.691731
Pik3cd	SE	149655126_149655257_149654815_149654959_149655335_149655500	3.19e-05	0.00653354
Ralgps2	SE	156900585_156900636_156887946_156888030_156907638_156907778	0.00522358	0.17102
Kmt2d	SE	98856606_98856828_98856269_98856389_98857387_98857435	0.0028221	0.114149
Vldlr	SE	27246592_27246676_27245534_27245681_27247009_27247090	0.0132227	0.312537
Alkbh7	SE	56998388_56998562_56997342_56997567_56998929_56999322	0.0237782	0.444467
Alkbh7	SE	56998670_56998795_56997342_56997567_56998929_56999322	0.0143904	0.328794
Osbpl3	SE	50333185_50333293_50328669_50328804_50336214_50336345	0.0305747	0.520144
Ttc37	SE	76135400_76135462_76135226_76135305_76136417_76136474	0.00191909	0.0899584
0610043K17Rik	SE	101374257_101374323_101366989_101367139_101398889_101399181	5.41e-05	0.00864383
Polh	SE	46194201_46194416_46190606_46190776_46198633_46198768	0.000362057	0.0296656
Wasf3	SE	146460964_146461140_146455543_146455661_146466797_146467064	0.0159456	0.350339
Phf19	SE	34898923_34899011_34898073_34898159_34899582_34899744	0.0199749	0.399021
Ptpre	SE	135601464_135601487_135537480_135538116_135643857_135643976	0.00290978	0.116248
Pde10a	SE	8930509_8930559_8929091_8929212_8941140_8941281	0.0014085	0.0744174
Ldah	SE	8238442_8238615_8227219_8227363_8268363_8268598	0.0134053	0.314122
Spryd7	SE	61540136_61540239_61531992_61535241_61545681_61545848	0.0294717	0.508403
Cct6b	SE	82760349_82760484_82754961_82755135_82762187_82762251	0.000479129	0.0369214
Mok	SE	110810604_110810778_110809908_110810023_110811778_110811880	3.28e-05	0.00660061
St7	SE	17850356_17850425_17848003_17848079_17852257_17852412	0.0489504	0.689052
Gm44536	SE	70209273_70209388_70201278_70201430_70285009_70285169	0.000230994	0.0222755
Dnah7b	SE	46340117_46340303_46337429_46337591_46343733_46343871	1.68e-06	0.000774056
Ccl25	SE	4349771_4349894_4325229_4325288_4353882_4354000	0.00304003	0.119493
Cacna1d	SE	30171295_30171399_30142547_30142717_30178544_30178741	0.0240907	0.448161
Ddx43	SE	78419211_78419350_78418332_78418442_78420588_78420676	0.00143755	0.0754842
Ccl25	SE	4327756_4327893_4325226_4325288_4353882_4354000	0.00351691	0.132258
Hace1	SE	45638320_45638403_45618497_45618629_45648590_45648687	3.81e-07	0.000231884
Ralbp1	SE	65858972_65859134_65854091_65854199_65867531_65867830	0.00509594	0.168391
Ralbp1	SE	65864273_65864732_65858972_65859134_65867531_65867830	0.0162349	0.354839
Slc50a1	SE	89269049_89269211_89268672_89268792_89269826_89269950	0.00188879	0.0893782
Kyat1	SE	30197956_30198159_30194053_30194112_30205632_30205801	0.00186354	0.0883979
Arhgef11	SE	87734423_87734552_87733147_87733504_87735344_87735571	0.0184714	0.378754
Tnnt3	SE	142514325_142514366_142512531_142512622_142515775_142516004	0.0488495	0.689052
Runx1	SE	92644153_92644345_92613598_92613760_92668707_92668812	0.0240904	0.448161
Itga6	SE	71853533_71853663_71849380_71849506_71855853_71856758	0.00560286	0.180551
Fam35a	SE	34269470_34269536_34267500_34268952_34309039_34309094	8.64e-07	0.000468115
Nf1	SE	79463232_79463295_79458770_79458906_79468716_79468875	0.00245245	0.105315
Focad	SE	88128897_88129052_88124587_88124662_88154636_88154741	0.00578511	0.182798
Acy1	SE	106436888_106436953_106436125_106436220_106437628_106437737	0.0115564	0.285919
Ermard	SE	15059765_15059984_15059343_15059469_15061068_15061182	0.00323987	0.124339
Golga2	SE	32296625_32296721_32293314_32293395_32296964_32297008	0.000499615	0.0377538
Kdm5a	SE	120381534_120381669_120374816_120374987_120382916_120383022	9.64e-09	1.15e-05
Kifc2	SE	76666228_76666350_76666028_76666133_76666446_76666570	0.00987218	0.258
Samd4	SE	47052849_47053113_47016276_47016795_47064219_47064329	0.00767362	0.219684
Arhgap42	SE	9180026_9180122_9155302_9155364_9238625_9239101	0.0151712	0.340423
Trim12c	SE	104347927_104348403_104346648_104346744_104353193_104353362	0.000234581	0.022364
Ttc3	SE	94409683_94409729_94403313_94403368_94410832_94410956	0.0225764	0.431519
Fam13c	SE	70448757_70448814_70440925_70441075_70451026_70451228	6.15e-05	0.00926039
Ttc3	SE	94412059_94412123_94403313_94403368_94415948_94416009	0.0453188	0.65709
Trim9	SE	70252442_70252484_70251010_70251260_70268061_70268200	5.78e-05	0.00901477
Apbb2	SE	66392272_66392335_66391771_66391857_66400075_66400281	0.0065729	0.233429
Abi1	SE	22953434_22953608_22946575_22946761_22957017_22957118	0.0303735	0.517623
Aspm	SE	139477345_139481140_139476707_139476902_139482337_139482504	1.67e-05	0.00426056
Ubap2l	SE	90031310_90031370_90028324_90028377_90034064_90034177	0.000381225	0.0308397
Rnf144a	SE	26389393_26389575_26339305_26339451_26415100_26415256	0.00116457	0.0663875
Fam169a	SE	97093590_97093690_97091817_97091952_97094061_97094147	0.0118011	0.289048
Ect2	SE	27148794_27148887_27146836_27147019_27148992_27149072	0.00750001	0.215664
Crtc2	SE	90259153_90259222_90254162_90254558_90259385_90259492	0.00319991	0.123535
Crtc2	SE	90257116_90257218_90254162_90254558_90259385_90259492	0.00478485	0.161394
Ccdc91	SE	147534028_147534189_147510823_147510902_147562634_147562712	0.0164373	0.357721
Mau2	SE	70025827_70025893_70023613_70023697_70026173_70026251	0.0377151	0.590597
Trpc6	SE	8677923_8678007_8658302_8658377_8679467_8679543	0.0096956	0.254751
Rims2	SE	39534837_39535017_39511263_39511374_39535871_39535981	0.0012766	0.0691675
Sectm1a	SE	121069587_121069896_121069034_121069088_121075565_121075721	0.00500545	0.167386
Zyg11b	SE	108272217_108272383_108265817_108266572_108300890_108301096	0.0471471	0.673885
Thap2	SE	115376351_115376547_115369965_115372946_115384204_115384435	0.0440536	0.645798
Ctnnd1	SE	84612531_84612549_84612023_84612092_84612935_84613089	0.00435218	0.153714
Ppp5c	SE	17022414_17022656_17015397_17015545_17027692_17027916	0.00104681	0.0621059
Kif23	SE	61923904_61924216_61919874_61919957_61924631_61924811	0.0234596	0.44057
Bend7	SE	4720480_4720564_4718144_4718292_4744218_4744521	0.00773306	0.220415
Cdpf1	SE	85810842_85811048_85809211_85809324_85811638_85811654	2.74e-10	4.82e-07
Rgs22	SE	36010540_36010627_36010287_36010337_36010741_36010835	0.00122592	0.0674587
Tor1aip2	SE	156041074_156041134_156035725_156035920_156059410_156059587	0.0200834	0.399945
Dpp9	SE	56196087_56196167_56194907_56195060_56198971_56199134	0.0189454	0.385553
Tor1aip2	SE	156051293_156051623_156041074_156041134_156059410_156059587	0.00066154	0.0454133
Ankzf1	SE	75194177_75194284_75192159_75192677_75194840_75194943	0.0355284	0.569586
Ppp1r26	SE	28448691_28448908_28447940_28447982_28450301_28455508	8.19e-06	0.00238388
Rgs19	SE	181691489_181691595_181691232_181691354_181693878_181693977	0.000632519	0.0442306
Ylpm1	SE	85060262_85060314_85057221_85057302_85064970_85065101	1.82e-06	0.00080793
Slc24a2	SE	87049883_87049934_87032192_87032291_87073187_87073296	8.14e-06	0.00238388
Dcun1d2	SE	13280908_13281125_13278516_13278685_13287803_13287841	9.17e-06	0.00259017
Tada2a	SE	84121081_84121188_84109953_84110045_84126987_84127095	0.00310241	0.120728
Ttll5	SE	86024219_86024342_86020520_86020603_86053142_86053760	0.00572907	0.181987
Gm43278	SE	134774493_134774940_134747041_134747308_134800445_134800596	0.000122012	0.0145936
Mapkapk3	SE	107257414_107257500_107257061_107257142_107258329_107258454	0.000144856	0.0160461
Gemin5	SE	58139494_58139608_58139018_58139141_58141587_58141809	5.94e-05	0.00916814
Rmdn3	SE	119140259_119140335_119140043_119140121_119142627_119142688	0.027676	0.489185
Kif3a	SE	53590716_53590725_53586834_53586930_53593373_53593530	1.95e-06	0.000815345
Mmaa	SE	79281176_79281654_79278201_79278324_79294913_79294937	7.49e-05	0.0104813
Folr1	SE	101868397_101868554_101863924_101864094_101869156_101869304	0.00397238	0.144406
Tmem2	SE	21780170_21780252_21778341_21778786_21792637_21792980	0.0333169	0.547678
Ubac2	SE	121905122_121905250_121878605_121878774_121907290_121907410	5.58e-05	0.00884582
Il15ra	SE	11720012_11720105_11718263_11718458_11723412_11723610	0.0200079	0.399021
Tmem38a	SE	72579959_72580144_72579562_72579719_72581184_72581272	0.00749219	0.215664
0610010K14Rik	SE	70235695_70235800_70235205_70235464_70236023_70236211	1.7e-07	0.00011057
Mpp3	SE	102010206_102010227_102009642_102009684_102011719_102011784	0.00183357	0.0876157
Plec	SE	76178518_76181899_76170974_76178385_76182909_76183008	0.00231094	0.101367
Orc1	SE	108588675_108588781_108579453_108579575_108595328_108595644	0.00701954	0.209214
5530601H04Rik	SE	105069610_105069699_105068463_105068628_105069999_105070087	6.22e-05	0.00926039
Zfp280d	SE	72339011_72339048_72338745_72338864_72360285_72360341	0.00153023	0.0780976
Zfp280d	SE	72351524_72351570_72338745_72338864_72360285_72360341	0.00182816	0.0875719
Milr1	SE	106761182_106761296_106754781_106755051_106763855_106763948	0.00939689	0.249934
Rpusd1	SE	25728202_25728391_25727750_25727847_25728522_25728646	0.00253764	0.106395
Nadsyn1	SE	143812489_143812607_143811168_143811300_143812762_143812851	4.69e-05	0.00795134
Firre	SE	50603438_50603525_50600743_50600898_50608686_50608814	0.0325953	0.542217
Kdm8	SE	125452227_125452728_125444675_125444792_125455090_125455257	1.86e-05	0.00452767
Alms1	SE	85651262_85651418_85643157_85643283_85656394_85656529	0.00252423	0.106395
Alms1	SE	85599844_85599970_85587530_85588026_85601198_85601391	0.0396112	0.606645
Prdm2	SE	143131709_143136099_143111633_143111777_143142123_143142234	0.00121623	0.0673628
Rnf38	SE	44158902_44159052_44152359_44152553_44167317_44167608	0.0236619	0.443144
Gpm6b	SE	166353564_166353684_166344691_166345081_166372637_166372824	0.00507429	0.16796
Tmem35b	SE	127127818_127127999_127126045_127126193_127128853_127129644	0.0157794	0.348793
Tut1	SE	8955386_8955577_8953849_8954021_8959086_8959402	0.0328956	0.544704
Tctn1	SE	122257469_122257621_122254483_122254583_122258834_122258965	0.00893625	0.242648
Tdrd9	SE	112027094_112027148_112026252_112026297_112036353_112036527	2.97e-10	4.82e-07
Abhd5	SE	122367888_122368261_122351607_122351839_122375905_122376060	0.00373091	0.138042
Tex14	SE	87554927_87554979_87551530_87551640_87555483_87555823	0.00307779	0.120283
Zfp862-ps	SE	48514151_48514326_48511814_48512512_48525023_48525122	0.00791327	0.224894
Zfp862-ps	SE	48514151_48514326_48511814_48512512_48527444_48527549	9.82e-06	0.0026977
Lef1	SE	131191022_131191106_131189334_131189425_131193128_131193251	0.000120542	0.0145067
Eno2	SE	124766104_124766327_124763726_124763924_124767032_124767102	1.68e-05	0.00426056
Timm9	SE	71132506_71132642_71132000_71132086_71136554_71136675	0.00354212	0.132547
Dixdc1	SE	50682536_50682626_50682032_50682200_50683724_50683796	1.83e-05	0.00452049
Rbms3	SE	116678646_116678697_116636368_116636479_116681130_116681227	0.0389829	0.60175
Rbms3	SE	116627889_116627937_116586017_116586095_116636368_116636479	0.00715127	0.21111
Phkg2	SE	127577974_127578029_127577534_127577710_127579666_127579732	0.00135054	0.0723354
Lrrc51	SE	101921503_101921566_101920636_101920774_101933763_101933857	5.28e-06	0.00180737
Sgk3	SE	9886046_9886142_9885666_9885753_9891360_9891450	0.00245121	0.105315
Rnf216	SE	143080962_143081077_143077426_143077477_143085870_143086035	0.000481102	0.0369274
Fopnl	SE	14311046_14311131_14299243_14300209_14313815_14314013	3.56e-06	0.00136197
Stag1	SE	100705152_100705254_100643447_100643796_100737977_100738142	0.00378105	0.139086
Stag1	SE	100712437_100712540_100643447_100643796_100737977_100738142	0.000709372	0.0470405
Afmid	SE	117835665_117835807_117835502_117835581_117836407_117836512	0.00266871	0.109566
Tdrd9	SE	112034581_112034682_112026252_112026297_112036353_112036527	1.23e-06	0.000612715
Cep57	SE	13812632_13812710_13810626_13810862_13813409_13813520	0.0114155	0.284236
Polk	SE	96483490_96484405_96482457_96482491_96486807_96486979	0.00127789	0.0691675
Il17re	SE	113459359_113459375_113458483_113459026_113462278_113462376	3.44e-05	0.00666641
Gba2	SE	43569488_43569661_43569180_43569285_43569829_43569955	0.0136964	0.31884
Gm10863	SE	79210190_79210249_79166040_79166179_79216109_79216168	5.12e-07	0.000302587
Cecr2	SE	120743782_120743866_120738155_120738325_120750851_120751005	0.0301752	0.516049
Wfdc8	SE	164598996_164599139_164597212_164597778_164599948_164600089	0.000303215	0.0262732
Fam188a	SE	12386608_12386679_12364446_12364519_12396178_12396258	4.12e-05	0.00717499
Dtnbp1	SE	44986034_44986095_44970045_44970178_45001916_45002096	0.00122356	0.0674587
Cdc16	SE	13758997_13759052_13757675_13757854_13759139_13759237	2.88e-08	2.81e-05
G2e3	SE	51363951_51364020_51363416_51363546_51365254_51365559	0.00262473	0.108645
Ttc14	SE	33803449_33803605_33803074_33803204_33803999_33804071	0.00101056	0.0613763
Gm13563	SE	26388241_26388392_26387597_26387782_26388553_26389018	0.00565454	0.181916
Ntan1	SE	13834680_13834794_13832336_13832434_13835134_13835451	0.023975	0.447289
Sec61a2	SE	5877854_5878008_5876840_5877001_5882580_5882690	0.000136137	0.0154209
Prr3	SE	35974522_35974813_35972540_35973803_35978380_35978443	0.0115217	0.285623
Arhgef12	SE	43040539_43040596_43027196_43027295_43042590_43042676	0.0216171	0.419941
Stx3	SE	11781566_11781680_11777087_11777170_11783025_11783136	0.00121248	0.0673462
Rnf41	SE	128435312_128435584_128428590_128428703_128436467_128436603	0.00125799	0.0686997
Bmper	SE	23399349_23399679_23381428_23381474_23406494_23406831	0.00139586	0.0741736
Mtmr12	SE	12244983_12245113_12237928_12238019_12251352_12251428	0.0169224	0.360716
Malsu1	SE	49075085_49075264_49073794_49074103_49082844_49082926	0.00944564	0.250207
Rbm44	SE	91150082_91150173_91145102_91145169_91152164_91153660	0.00207199	0.0950324
Pdk1	SE	71875405_71875547_71873223_71873565_71880038_71880110	0.000129328	0.0149194
Klhdc1	SE	69258022_69258106_69256174_69256258_69258568_69258627	0.0130258	0.310076
Kif1c	SE	70702371_70702551_70700560_70700709_70702771_70702905	0.0179982	0.372894
Myo5a	SE	75196125_75196200_75193938_75194137_75197642_75197736	0.000276346	0.0247023
Col13a1	SE	61903089_61903140_61896345_61896372_61908681_61908717	0.0193158	0.390881
Col13a1	SE	61891207_61891264_61887248_61887356_61892955_61892982	0.000685318	0.0462317
3110053B16Rik	SE	20915747_20915791_20914758_20914841_20920841_20921262	0.024345	0.449887
Rhpn1	SE	75713001_75713024_75712256_75712451_75713218_75713365	0.016817	0.359944
AI413582	SE	27564561_27564750_27564384_27564410_27565659_27565732	0.028558	0.497113
Nrg1	SE	31831204_31831228_31826252_31826355_31837669_31837728	1.26e-05	0.00332497
Rps6ka5	SE	100619525_100619641_100615996_100616104_100654270_100654489	0.00108577	0.0633778
Gtpbp3	SE	71490894_71490967_71490334_71490537_71491065_71491209	0.000169906	0.0177139
Tead1	SE	112842039_112842102_112841887_112841950_112856797_112856932	0.0234312	0.44057
P2rx4	SE	122714398_122714546_122707543_122707787_122718312_122718384	0.022654	0.432578
Zfp609	SE	65794621_65795495_65730975_65731201_65827465_65827564	0.000610601	0.0432035
A430078G23Rik	SE	3387633_3387711_3386921_3386966_3388000_3388103	0.0257795	0.468404
Kcnu1	SE	25932239_25932434_25921419_25921559_25934404_25934517	0.0166738	0.359347
Rbm4	SE	4787360_4788042_4784292_4785567_4792397_4792820	2.69e-05	0.00592581
D6Wsu163e	SE	126966879_126967082_126961965_126962040_126973555_126973613	0.000859525	0.054584
Cdhr5	SE	141271516_141272002_141269856_141270017_141272100_141272185	2.22e-16	1.44e-12
Dock3	SE	106941497_106941524_106941282_106941378_106943906_106943992	0.000159628	0.0170995
Ercc6	SE	32516946_32517378_32513520_32513599_32526148_32526878	0.0140608	0.322964
Crem	SE	3287903_3288092_3276693_3276729_3295039_3295182	6.89e-07	0.000383977
Mtr	SE	12195237_12195393_12190203_12190404_12197912_12197988	0.00928032	0.248871
Crem	SE	3327493_3327591_3325360_3325478_3337379_3337488	0.0473696	0.675159
Map7d1	SE	126238521_126238632_126236895_126237278_126240031_126240137	0.0196083	0.394513
Hsd11b2	SE	105522764_105522902_105522472_105522658_105523060_105523988	0.000380925	0.0308397
Astn2	SE	66119056_66119212_66059129_66059237_66185123_66185508	0.000148494	0.0163562
E2f7	SE	110778818_110779302_110775318_110775388_110780766_110781022	0.0273499	0.485622
Syce1l	SE	113649486_113649549_113643212_113643303_113651605_113651665	0.0039861	0.144406
Limch1	SE	66993142_66993178_66974409_66974662_66997119_66997246	0.0174021	0.365988
Pag1	SE	9787261_9787320_9752412_9752486_9833210_9833679	0.0170196	0.361453
Lrp12	SE	39904538_39904595_39885005_39885141_39943603_39943788	0.00347369	0.131757
Kdm1b	SE	47068463_47068635_47067444_47067582_47071891_47072019	0.00127187	0.0691675
Pigg	SE	108317262_108317472_108313958_108314164_108318824_108319013	0.000498338	0.0377538
Ddhd2	SE	25741286_25741354_25739462_25739585_25741600_25741809	0.0009669	0.0592988
1300002E11Rik	SE	21800714_21800836_21795849_21795975_21801280_21801356	0.00136402	0.0728575
Pik3cd	SE	149655126_149655248_149654815_149654959_149655335_149655500	0.000137677	0.0154262
Cenpm	SE	82239292_82239384_82233778_82234509_82239878_82239958	0.0106329	0.272762
Map6	SE	99317471_99317668_99315688_99315902_99335984_99337137	0.0310882	0.525721
Col22a1	SE	71865631_71865679_71860959_71861073_71868960_71869005	0.000761691	0.0493353
Dnm2	SE	21480406_21480545_21478898_21479037_21481332_21481419	0.00185071	0.0880033
Col22a1	SE	71846169_71846223_71841273_71841327_71848538_71848592	0.0252728	0.462646
Tctn3	SE	40609201_40609332_40608901_40609010_40611293_40611412	3.22e-05	0.00653354
Adam32	SE	24863388_24863545_24852239_24852278_24870685_24870769	0.0453491	0.65709
Chac2	SE	30979564_30979600_30976706_30977746_30986111_30986350	0.00851902	0.235919
Tmx3	SE	90534381_90534438_90533220_90533274_90538498_90538567	0.00153873	0.0783267
Sdk2	SE	113823370_113823427_113821575_113821677_113825014_113825150	0.0417881	0.626211
Eml4	SE	83425257_83425431_83421605_83421735_83427999_83428025	0.00209505	0.0951142
Senp6	SE	80089848_80089906_80066902_80067572_80103693_80103764	0.0116811	0.287908
Plekhm1	SE	103394687_103395314_103386957_103387348_103397026_103397274	0.022418	0.429333
Slc27a1	SE	71570720_71570888_71568926_71569023_71579403_71579798	0.00379186	0.13922
Rere	SE	150439342_150439468_150431522_150431593_150468694_150468800	0.017825	0.372472
Npat	SE	53562041_53563676_53559081_53559207_53566716_53566832	0.00417786	0.150279
Smc1b	SE	85123720_85123959_85120617_85120758_85127467_85127671	9.34e-05	0.0118979
Fn3krp	SE	121426620_121426703_121421400_121421603_121429044_121429167	3.47e-08	2.94e-05
Lhpp	SE	132630481_132630669_132610638_132610830_132634000_132634154	0.000415982	0.0328339
2010001A14Rik	SE	57796025_57796173_57795498_57795794_57796311_57796397	0.00202738	0.0934417
Vill	SE	119069882_119070068_119068311_119068456_119070277_119070349	0.00477573	0.161394
Gper1	SE	139423660_139423872_139423150_139423354_139425679_139427800	0.0448921	0.652508
Slc25a53	SE	137027989_137028154_137016248_137016339_137032350_137032500	3.65e-05	0.00683531
Omd	SE	49589461_49590415_49582765_49582813_49592055_49592609	3.14e-05	0.00652122
Arap2	SE	62606074_62606209_62602444_62604656_62611703_62611767	0.0059771	0.187347
Tnrc6a	SE	123169535_123172118_123162493_123162877_123173232_123173409	0.0461612	0.664176
Myo1b	SE	51768649_51768736_51766821_51766908_51769003_51769090	0.0195785	0.39432
Fam184a	SE	53646982_53647129_53640944_53641062_53647571_53647756	0.00231893	0.101367
Gng12	SE	66943824_66943882_66896439_66896515_67015724_67015843	0.00041123	0.0325908
Mettl10	SE	132831359_132831576_132827456_132827882_132837099_132837207	0.00117154	0.066541
Tars2	SE	95750866_95750984_95750700_95750765_95753006_95753130	0.0259033	0.469777
Gstm6	SE	107942332_107942414_107941188_107941326_107943244_107943320	0.0113041	0.283192
1700012B07Rik	SE	109794105_109794279_109791556_109791794_109797277_109797411	0.000153333	0.01671
Dsn1	SE	157005167_157005491_157002688_157002762_157005847_157005873	1.97e-06	0.000815345
Mapt	SE	104318156_104318249_104310268_104310534_104321350_104321432	0.00773246	0.220415
Gnpda1	SE	38331967_38332152_38330485_38330660_38333153_38333336	0.000721089	0.0474945
Dctd	SE	48137257_48137374_48111967_48112103_48140342_48140609	6.66e-05	0.00952036
Pld2	SE	70540844_70540954_70540305_70540614_70541062_70541193	7.82e-06	0.00234481
Ppp2r2d	SE	138869689_138869855_138868409_138868507_138870389_138870502	0.0171279	0.362303
Arhgap12	SE	6057516_6057591_6052861_6052923_6061846_6061972	0.00543056	0.176457
Tpd52l2	SE	181502875_181502935_181501904_181502053_181508165_181508267	0.000194715	0.0196692
Ric8b	SE	85001781_85001901_84992119_84992264_85015075_85016447	0.0211926	0.412758
6030458C11Rik	SE	12823560_12823706_12821403_12821553_12824466_12824657	0.00569799	0.181987
Atxn7l1	SE	33148432_33148501_33147710_33147915_33217711_33217816	0.0394745	0.60618
Gm45447	SE	161112103_161112319_161109410_161109828_161113687_161114858	0.00348862	0.132066
Zfyve28	SE	34224951_34225053_34199592_34199744_34232153_34232243	0.00933849	0.249401
Synrg	SE	84039655_84039691_84039210_84039321_84040796_84040954	0.0103595	0.266801
Col25a1	SE	130575374_130575410_130570308_130570335_130577301_130577355	0.0194716	0.393386
2810429I04Rik	SE	3479521_3479574_3478233_3478390_3479908_3480001	0.0184756	0.378754
Odf2	SE	29893000_29893154_29892185_29892276_29893443_29893569	0.00737255	0.21421
Znrf2	SE	54884764_54884846_54878348_54878454_54888455_54893500	1.53e-06	0.000729594
Pex11g	SE	3465782_3465971_3463921_3464100_3467571_3467680	0.0332241	0.547538
Asah2	SE	32016484_32016566_32014201_32014317_32016683_32016788	0.0134518	0.314835
Sar1b	SE	51777486_51777561_51763686_51763791_51779688_51779808	6.65e-06	0.00214713
Naxd	SE	11511876_11511997_11510226_11510347_11512894_11513287	0.00315154	0.122152
Dzip1l	SE	99632636_99632748_99629541_99629669_99637346_99637922	0.0085433	0.236256
Zfp655	SE	145235305_145235391_145233440_145233602_145235736_145235863	3.89e-06	0.00140468
Snrk	SE	122136905_122137601_122117302_122117407_122157155_122157297	0.00104425	0.0621059
Ttc3	SE	94393111_94393174_94370617_94370861_94403313_94403368	0.0171077	0.362303
Edrf1	SE	133646989_133647091_133643992_133644149_133647344_133647466	0.0328519	0.544626
Ttbk2	SE	120825241_120825315_120822472_120822608_120850055_120850406	0.0126875	0.304624
Cnksr2	SE	157890082_157890172_157888397_157888612_157906669_157906881	0.0430535	0.639277
Sycp2	SE	178347775_178347834_178347572_178347654_178348221_178348321	0.0204433	0.403812
Nap1l4	SE	143527165_143527311_143521400_143521430_143532308_143532380	8.54e-05	0.0112923
Adipor2	SE	119358921_119359109_119357215_119357409_119359350_119359537	0.0159572	0.350339
Dnase1l1	SE	74274367_74274468_74273216_74273691_74277038_74277342	0.0134033	0.314122
Scarb1	SE	125281104_125281233_125277086_125277865_125283898_125284045	8.22e-05	0.0109772
Arhgap12	SE	6115813_6115850_6069830_6070091_6135803_6135907	2.8e-05	0.00592581
Atat1	SE	35904107_35904176_35901982_35902054_35904289_35904335	0.0336782	0.549988
Dnmt3b	SE	153670848_153670908_153670302_153670447_153672215_153672335	0.00272962	0.1118
2900076A07Rik	SE	81528786_81528940_81523549_81523676_81529346_81529438	3.45e-05	0.00666641
Tcf7l2	SE	55924529_55924580_55923895_55923944_55925976_55926049	8.71e-05	0.0113232
Slc35a1	SE	34683284_34683462_34675471_34675631_34687243_34687438	0.00103467	0.0621059
Fam129c	SE	71605606_71605718_71604927_71605035_71606660_71606744	0.00496194	0.166503
Nup62cl	SE	140027567_140027702_140025228_140025340_140027838_140027888	0.0113273	0.283192
Stk10	SE	32598438_32598984_32596614_32596749_32600740_32600871	0.0462081	0.664361
4930402H24Rik	SE	130713396_130713503_130712951_130713026_130717260_130717347	0.000693216	0.0464431
Tmem57	SE	134836322_134836449_134833197_134833321_134837848_134837990	0.00016945	0.0177139
Sycp2	SE	178360305_178360468_178358708_178358746_178362939_178362991	0.000249775	0.0230636
Spdya	SE	71562502_71562588_71558620_71558679_71569016_71569188	0.00898986	0.243507
Zfp738	SE	67672997_67673093_67667436_67671611_67673561_67673688	5.75e-05	0.00901477
Fancl	SE	26407547_26407648_26399648_26399709_26422407_26422504	0.0275569	0.487523
Tcf3	SE	80410397_80410624_80409513_80410274_80412826_80413062	0.0144178	0.328794
Mynn	SE	30603503_30603800_30602064_30602695_30607036_30607830	0.0107131	0.274099
Upf2	SE	6027212_6027488_6026114_6026318_6034111_6034251	0.00222714	0.098951
Nmd3	SE	69726360_69726457_69722408_69722466_69729337_69729418	0.000124472	0.0146187
Nmd3	SE	69724256_69724391_69722408_69722466_69729337_69729418	0.000333519	0.0280271
Xndc1	SE	102069896_102069991_102065592_102065942_102071218_102071361	0.00430503	0.152602
Ints7	SE	191602244_191602362_191596886_191597009_191604806_191604941	0.0288891	0.501534
Ap4e1	SE	127043646_127043756_127043420_127043543_127046147_127046287	0.00285599	0.114574
Mprip	SE	59772151_59772217_59771616_59771702_59775515_59780854	0.0145493	0.330214
Vrk3	SE	44759699_44759894_44757745_44757895_44762990_44763057	0.0156515	0.346707
Nif3l1	SE	58457779_58457863_58455596_58455735_58461140_58463456	0.00736523	0.21421
Madd	SE	91160316_91160370_91159204_91159305_91162027_91162234	0.0103474	0.266801
Hnrnph2	SE	134602917_134602962_134602691_134602762_134604854_134607054	0.0110743	0.280033
Folr1	SE	101868397_101868551_101863924_101864094_101869156_101869304	0.00290358	0.116238
Uspl1	SE	149187707_149187876_149185484_149185661_149188344_149188473	0.00107459	0.0631032
Fggy	SE	95623480_95623569_95600964_95601116_95696959_95697075	0.000432741	0.0336124
Gpx8	SE	113045431_113045693_113042762_113043299_113046171_113046388	0.000230531	0.0222755
Foxk2	SE	121299583_121299793_121298558_121298855_121306767_121309896	0.0245908	0.452711
Btbd10	SE	113364904_113364969_113335321_113335518_113368871_113368958	0.0202577	0.40194
Tmem53	SE	117265859_117265975_117251950_117252134_117267889_117268580	0.00445676	0.155837
Rrp1b	SE	32047673_32047731_32045928_32046011_32048552_32048638	0.0124166	0.299598
Stk11	SE	80126032_80126165_80125478_80125568_80126232_80126369	0.00304873	0.119594
Iqce	SE	140674336_140674360_140671806_140671926_140677415_140677506	0.000632649	0.0442306
Rapgef6	SE	54561324_54561394_54552789_54552873_54568352_54568496	0.00739815	0.21442
Zfp809	SE	22237674_22237784_22235019_22235146_22238541_22239253	6.33e-05	0.0092729
Sp100	SE	85681085_85681139_85679058_85679109_85691974_85692049	0.00908914	0.245432
Zfp280d	SE	72301866_72302006_72301700_72301766_72307950_72308068	0.00017175	0.0178108
Cetn4	SE	37309936_37310065_37309344_37309482_37310292_37310439	6.27e-09	8.14e-06
2610020H08Rik	SE	119802740_119802837_119794005_119794502_119805142_119805286	0.000130978	0.0149777
Tex9	SE	72477736_72477910_72473657_72473792_72478339_72478422	0.000397367	0.0317503
Tex9	SE	72482446_72482529_72480596_72480775_72484068_72484114	0.00160664	0.0812739
Rbfox2	SE	77094450_77094490_77086066_77086155_77097939_77098084	0.00202199	0.0934142
Ube2w	SE	16597950_16598053_16581926_16582002_16602261_16602353	0.0325604	0.542098
Cyb5r4	SE	87057141_87057294_87055764_87055905_87058924_87059075	0.0117935	0.289048
Gm20517	SE	47618808_47619062_47612962_47613117_47649949_47651613	0.0402101	0.610543
Spats2l	SE	57900633_57900840_57885702_57885949_57902088_57902224	0.00150014	0.077168
Phkb	SE	85843003_85843112_85841001_85841103_85875633_85875723	0.00410853	0.148333
Rps6kc1	SE	190783563_190783646_190772878_190773703_190798651_190798741	0.00504734	0.167884
G3bp1	SE	55497912_55498041_55496143_55496245_55499458_55504838	0.000529672	0.039414
Hivep3	SE	120122871_120123047_120103711_120103854_120128275_120128362	0.00444437	0.155837
Prrc2c	SE	162697432_162698273_162696277_162696363_162698878_162699033	0.000175832	0.0181377
Drc1	SE	30348662_30348749_30347055_30347193_30350400_30350523	0.0257559	0.468404
Wdpcp	SE	21663996_21664067_21660888_21660939_21664325_21664385	0.0298841	0.512505
Gm7972	SE	75483098_75483197_75481447_75481664_75484649_75484702	0.00198727	0.0920282
Gm7972	SE	75479671_75479804_75468615_75468683_75481447_75481616	0.0125955	0.30279
Sephs1	SE	4884331_4884605_4881563_4881860_4896688_4896779	0.00433776	0.153483
Rps6kc1	SE	190782534_190782630_190772878_190773703_190783563_190783646	0.022976	0.436163
Gm7972	SE	75477978_75478113_75468615_75468683_75479671_75479804	0.0152158	0.340423
Gm16201	SE	139950737_139950884_139950395_139950477_139962799_139962886	9.57e-05	0.012119
Alkbh7	SE	56998388_56998562_56997342_56997567_56998670_56998795	0.000675152	0.045704
Tmem234	SE	129602194_129602261_129600982_129601134_129607086_129607179	0.0160211	0.350953
Sobp	SE	43074592_43074688_43020981_43022918_43127778_43127930	0.0488342	0.689052
4930432K21Rik	SE	84162299_84162404_84161212_84161291_84166580_84167690	0.000656484	0.0453859
Zfp710	SE	80088534_80088632_80086433_80086608_80090334_80091830	0.0387229	0.600113
Trak2	SE	58935745_58935940_58926650_58926727_58946246_58946535	0.00051477	0.0385984
1700010I14Rik	SE	9001769_9001945_9001127_9001186_9005191_9005245	0.0217172	0.421293
Zfp977	SE	42582905_42583032_42582646_42582707_42592436_42592547	3.98e-05	0.0070998
Sh2d4a	SE	68282032_68282411_68276566_68276872_68294302_68294459	0.00470219	0.160269
Atf2	SE	73845438_73845553_73842359_73842446_73846196_73846375	0.000165377	0.0176033
Fbxo45	SE	32238399_32238756_32230111_32233268_32246493_32247158	0.0174958	0.366771
Inppl1	SE	101823512_101823646_101822631_101823403_101823892_101824559	0.000559085	0.0408236
Stau2	SE	16486019_16486150_16463034_16463194_16509341_16509408	0.00847948	0.235493
U2af1	SE	31651645_31651712_31648844_31648894_31652501_31652568	8.57e-05	0.0112923
Enah	SE	181921657_181922500_181919324_181919629_181923559_181923840	0.0046975	0.160269
Mdm2	SE	117709699_117709784_117705154_117705229_117709945_117710028	0.00666314	0.201475
1700123M08Rik	SE	11980141_11980408_11966573_11966683_11993864_11993999	0.00572463	0.181987
Pum3	SE	27399678_27399821_27396294_27396382_27412181_27412262	7.57e-05	0.0104813
Sycp2l	SE	41157433_41157517_41155518_41155645_41163071_41163145	1.71e-06	0.000774056
Pgs1	SE	118014573_118014722_118005369_118005891_118019606_118019732	0.0332166	0.547538
Bbs9	SE	22476569_22476625_22475721_22476055_22490817_22490940	0.000136839	0.0154209
Cish	SE	107299923_107300144_107296025_107297034_107300367_107301987	0.0378831	0.591803
Fam178a	SE	44966966_44967069_44960733_44960875_44967502_44967679	0.00702888	0.209214
Sema6a	SE	47270608_47270773_47245253_47249584_47276585_47276606	0.0150028	0.338535
Megf6	SE	154224100_154224223_154182657_154182767_154242401_154242524	0.0144193	0.328794
Fance	SE	28317157_28317223_28316858_28316903_28317467_28317611	0.0364758	0.578157
Fbxw7	SE	84890094_84890252_84864144_84864200_84903500_84904079	0.00623232	0.191649
Fam118b	SE	35244613_35244706_35235230_35235483_35267722_35267780	0.00222812	0.098951
St5	SE	109556210_109557461_109552974_109553111_109570006_109570111	0.0166222	0.359347
Mapk8ip3	SE	24917994_24918139_24914458_24914705_24923815_24923907	0.010447	0.268701
Lsm14b	SE	180031360_180031528_180027899_180028035_180032060_180032222	0.0193275	0.390881
Mapk8ip3	SE	24918087_24918136_24914458_24914705_24923815_24923907	0.00535695	0.174647
Rapgef2	SE	79082623_79082647_79081061_79081285_79083198_79083322	0.0200166	0.399021
Sptbn5	SE	120069147_120069388_120068883_120069023_120070286_120070574	0.0030096	0.119016
Cdadc1	SE	59568947_59569008_59560895_59560921_59573646_59573836	0.0237521	0.444406
Uggt1	SE	36176775_36176799_36176232_36176327_36177517_36177616	0.00810822	0.228767
Pcsk4	SE	80322080_80322209_80321282_80321951_80322723_80322848	0.00990771	0.258236
Med15	SE	17671544_17671673_17655677_17655805_17673068_17673398	0.0337959	0.549988
Hexdc	SE	121216892_121217076_121214759_121214924_121218087_121218159	0.0144457	0.32901
Tmprss13	SE	45338255_45338418_45337045_45337089_45339234_45339407	0.00030563	0.0263653
Mybl1	SE	9671578_9671758_9667414_9670012_9672211_9672316	0.00214827	0.0965041
Eif2ak1	SE	143899013_143899247_143897474_143897557_143901784_143904251	0.006223	0.191649
Kank1	SE	25318304_25318432_25274747_25274834_25378410_25378530	0.000125971	0.0147062
Casp8ap2	SE	32639363_32641558_32634767_32634883_32643539_32646660	0.00789722	0.224765
Espn	SE	152129611_152129638_152128407_152128553_152130768_152130961	0.0499359	0.696886
Rangap1	SE	81709486_81709606_81706400_81706503_81710360_81710553	0.00364304	0.135802
1300002E11Rik	SE	21800774_21800836_21795849_21795975_21801280_21801356	0.000244176	0.0227773
4833439L19Rik	SE	54564184_54564272_54559197_54559324_54565181_54565435	0.00429061	0.152602
9430091E24Rik	SE	111143601_111143724_111137442_111137552_111145403_111145480	0.02066	0.406036
Cluh	SE	74665692_74665777_74665181_74665426_74665922_74666076	0.039228	0.604576
Sgsm2	SE	74867030_74867155_74866568_74866636_74867610_74867745	0.0274867	0.487163
Ubxn2a	SE	4891314_4891421_4885720_4885858_4894537_4894679	0.00452493	0.157532
Ubr2	SE	46981353_46981442_46980319_46980418_46982265_46982373	0.0240581	0.448161
Sec31a	SE	100388533_100388611_100386127_100386203_100390758_100390833	0.00181525	0.0873757
Sec31a	SE	100389067_100389106_100386127_100386203_100390758_100390833	0.00912792	0.245922
2700081O15Rik	SE	7421254_7421644_7420066_7420561_7422642_7425904	0.00861098	0.237118
Esco1	SE	10593745_10595875_10585977_10586041_10610025_10610352	0.0300426	0.514232
Pdss2	SE	43413514_43413547_43395560_43395692_43439798_43440602	0.0231603	0.437957
Pitpnb	SE	111385519_111385604_111382987_111383110_111386502_111388359	0.0232277	0.438806
Brpf3	SE	28828343_28828441_28823972_28824066_28835761_28835916	0.000498668	0.0377538
2610020H08Rik	SE	119828091_119828206_119827302_119827376_119832670_119832775	0.0374213	0.587732
Wdr37	SE	8861087_8861265_8856831_8856928_8870869_8871023	0.00519316	0.170447
Slc18b1	SE	23810788_23810945_23805892_23806040_23816292_23816429	0.00023041	0.0222755
Braf	SE	39648820_39648856_39648449_39648486_39651604_39651764	0.000166176	0.0176033
Fam149b	SE	20358023_20358140_20352703_20352839_20367845_20368563	0.00918659	0.247037
Hpf1	SE	60896737_60896836_60893700_60893860_60905547_60905720	0.017373	0.365988
Dnajc13	SE	104160478_104160622_104156813_104156913_104162272_104162413	0.000112319	0.0136861
Hpf1	SE	60896737_60896836_60890450_60890536_60903999_60904087	0.0285456	0.497113
Hpf1	SE	60895460_60895650_60893700_60893860_60896737_60896836	3.29e-08	2.94e-05
E130307A14Rik	SE	39640379_39640511_39622975_39623091_39654521_39654688	0.0209855	0.410776
Fn1	SE	71613762_71614035_71612467_71612650_71615359_71615551	0.00612153	0.189738
Fn1	SE	71603659_71603929_71602309_71602497_71604969_71605083	2e-05	0.00476634
Samd4	SE	47016276_47016795_46884398_46885016_47064219_47064329	0.000227671	0.0222755
Gm30075	SE	73229110_73229239_73202774_73205634_73238515_73238531	9.75e-10	1.46e-06
Coq2	SE	100667891_100668058_100663579_100663701_100673988_100674284	0.0388774	0.600597
Atg7	SE	114646936_114647057_114643126_114643150_114672973_114673140	0.011805	0.289048
Pkp4	SE	59214677_59214814_59160849_59161128_59266387_59266500	0.0245858	0.452711
Uty	SE	1099581_1099752_1097143_1098573_1102764_1102891	0.00250886	0.106395
Crocc	SE	141046771_141046855_141046635_141046697_141051040_141051195	0.014597	0.330525
Mgat5	SE	127249789_127249839_127205017_127205427_127306633_127307016	3.45e-08	2.94e-05
Tnrc6b	SE	80882943_80883102_80878866_80881206_80884206_80884382	0.00614574	0.189885
Zfp810	SE	22280452_22280559_22276747_22279280_22283167_22283260	0.00298307	0.118448
Zbtb37	SE	161029641_161029741_161002921_161020406_161031804_161032764	0.00221442	0.0987927
Gm973	SE	59629994_59630326_59625086_59625177_59632213_59632416	0.00232602	0.10145
Jmjd1c	SE	67216982_67217107_67215269_67215375_67218037_67218181	0.0120838	0.294116
Zyg11b	SE	108265817_108266572_108259949_108260090_108300890_108301096	0.00248427	0.10613
Abcb6	SE	75172790_75172965_75172554_75172667_75173544_75173649	0.0424695	0.633986
Dnajc1	SE	18293953_18294044_18231703_18231823_18316357_18316404	0.0198965	0.398326
Lin54	SE	100454434_100454508_100453939_100454137_100459585_100459802	0.00458683	0.158274
Erg	SE	95377300_95377372_95369994_95370063_95379111_95379192	0.0454225	0.65709
Cep55	SE	38057409_38057566_38055041_38055317_38057788_38057983	0.0235622	0.4417
Smyd4	SE	75403416_75403540_75403108_75403225_75404765_75405705	0.00559707	0.180551
Smyd4	SE	75382249_75382394_75349668_75349814_75387410_75387500	0.000203655	0.0203613
Gm15408	SE	149011573_149011707_149007885_149008015_149011998_149012776	0.00816998	0.229513
Dennd1b	SE	139041923_139042043_139023104_139023148_139053345_139053415	0.0178182	0.372472
Tpd52l1	SE	31341139_31341178_31338184_31338245_31346610_31346712	0.0243439	0.449887
Brd8	SE	34610409_34610628_34609804_34609949_34611131_34611268	0.0056878	0.181987
Capn3	SE	120501210_120501324_120496977_120497014_120502102_120502180	0.00439252	0.154858
1810062O18Rik	SE	20569869_20570022_20565010_20565047_20570341_20570680	0.0118775	0.29018
Ppt1	SE	122854379_122854478_122848432_122848535_122857509_122859078	6.49e-06	0.00214323
Ltbp3	SE	5753632_5753755_5752018_5752141_5755545_5755674	0.00111051	0.0642447
Nmnat3	SE	98399455_98399639_98354018_98354164_98403533_98403613	7.66e-05	0.0104813
Mtmr10	SE	64308127_64308218_64300539_64300682_64314083_64314264	0.0136145	0.317878
Ppm1k	SE	57522748_57522849_57515592_57515758_57524736_57525254	0.0116151	0.286806
Xrcc3	SE	111809751_111809964_111807832_111807987_111810857_111810995	0.0315235	0.530269
Med23	SE	24900695_24900820_24898409_24898573_24902002_24902208	0.00026787	0.024265
Slc9a3r2	SE	24640594_24640657_24639281_24640389_24641708_24641752	2.21e-05	0.00501523
Fam63b	SE	70616763_70616906_70610828_70611002_70626754_70626857	7.79e-05	0.0104813
Dab2	SE	6424634_6424697_6424196_6424250_6429295_6429949	0.0169348	0.360716
Zfp939	SE	39472861_39474772_39467341_39467434_39477310_39477413	0.013294	0.313397
Card19	SE	49203928_49203988_49203717_49203789_49205191_49205345	0.0111914	0.281899
Npcd	SE	79828687_79828978_79794255_79794475_79833511_79833578	0.00833727	0.232537
Wdr78	SE	103064463_103064550_103062295_103062447_103066259_103066486	0.00663863	0.201475
Tmem255a	SE	38226887_38226956_38225053_38225125_38233102_38233192	0.0317226	0.532156
Kif13a	SE	46864818_46864831_46848325_46848386_46929215_46929306	0.0335132	0.549528
Apip	SE	103087112_103087161_103082954_103083055_103088560_103088678	0.00608788	0.189325
Emc8	SE	120658527_120658622_120653913_120658248_120667756_120668121	0.0427204	0.63627
Rab7b	SE	131705595_131705721_131697828_131697955_131711619_131715439	7.68e-06	0.00234481
2810408A11Rik	SE	69897618_69897754_69897362_69897492_69898102_69898150	0.0459353	0.661902
Wdr44	SE	23732317_23732351_23693050_23693539_23749905_23749980	0.000247101	0.0229404
Ssbp4	SE	70599839_70599899_70599687_70599757_70600395_70600485	9.47e-07	0.00049913
Ormdl2	SE	128820260_128820514_128819953_128820105_128821541_128821631	0.00577054	0.182798
Cchcr1	SE	35517790_35517939_35517175_35517229_35518216_35518283	0.0313931	0.528988
Sec22c	SE	121692909_121693073_121690235_121690415_121695533_121695742	0.0250936	0.459798
Pigv	SE	133664657_133665779_133660386_133662791_133669737_133669860	0.00430165	0.152602
P2rx6	SE	17568260_17568370_17568032_17568174_17570357_17570451	0.000182233	0.0186991
Fgfrl1	SE	108703285_108703558_108694894_108695118_108704666_108704747	0.000653746	0.0453574
Zfyve26	SE	79261577_79261824_79260800_79260899_79263772_79263949	0.0208009	0.408394
Tcfl5	SE	180635253_180635395_180621955_180622714_180638403_180638647	0.000796408	0.0510749
Mcrs1	SE	99249875_99250014_99248701_99248860_99251861_99251961	0.0102687	0.265163
Zfp449	SE	56348282_56348728_56346399_56346439_56353462_56353667	0.0139075	0.322019
Zkscan6	SE	65807964_65808064_65807243_65807261_65814364_65814851	0.00668564	0.201475
Tars2	SE	95750866_95750984_95750700_95750765_95751505_95751630	0.0333559	0.547857
Abi3bp	SE	56595239_56595314_56594461_56594536_56596233_56596305	3.72e-05	0.00690737
Vrk1	SE	106073618_106073678_106070524_106070615_106075006_106077410	0.00385471	0.140997
N6amt1	SE	87366138_87366280_87362519_87362603_87367464_87368742	0.00303721	0.119493
Gm26797	SE	122307403_122307444_122304827_122304893_122307956_122307999	0.00590607	0.185659
Pkig	SE	163659149_163659235_163658414_163658492_163721127_163721301	0.0156112	0.346647
Ints10	SE	68797758_68797898_68796716_68796820_68802315_68802397	0.00281396	0.114149
Dleu2	SE	61632436_61632483_61602838_61603806_61635524_61635591	4.5e-11	8.77e-08
Ccdc82	SE	13253225_13253430_13246978_13247021_13262735_13262828	0.00169224	0.0834416
Slx4	SE	3995693_3995877_3994707_3994920_3999117_3999345	0.0184878	0.378754
Tmpo	SE	91152627_91152738_91151708_91151797_91158747_91158845	0.000142462	0.0158711
Tmpo	SE	91153084_91153180_91151708_91151797_91158747_91158845	0.0363689	0.576978
Serp2	SE	76549981_76550054_76532813_76533246_76556430_76556687	0.020486	0.403837
Fmnl3	SE	99329279_99329432_99328057_99328166_99331986_99332070	0.000585212	0.0421007
Mcph1	SE	18627117_18627240_18625559_18625674_18641564_18641665	0.0228201	0.434049
Nap1l4	SE	143541747_143541778_143535897_143536039_143549041_143549092	0.0111779	0.281899
Wee1	SE	110130828_110130975_110126700_110126822_110134754_110134850	0.00160914	0.0812739
Dennd2d	SE	106488571_106488641_106487850_106487963_106490334_106490412	0.00647146	0.197445
Ankrd31	SE	96869371_96869487_96866330_96866493_96872636_96872724	5.19e-05	0.00849698
Mbd5	SE	49278580_49279783_49274562_49274774_49298655_49298729	0.00253572	0.106395
Gk	SE	85706237_85706324_85701936_85704396_85711050_85711131	0.000611621	0.0432035
Phf20	SE	156254225_156254310_156251775_156251947_156267154_156267542	7.7e-06	0.00234481
Rspry1	SE	94622833_94623335_94601936_94602430_94629055_94629108	0.00218871	0.0978697
Phf20	SE	156264280_156264360_156251775_156251947_156267154_156267542	6.66e-05	0.00952036
Sycp1	SE	102840861_102841041_102820538_102820682_102845031_102845088	6.3e-05	0.0092729
Tnnt2	SE	135843784_135843814_135841900_135841911_135845554_135845644	0.0175268	0.367028
Apc	SE	34261004_34261157_34220983_34221276_34268297_34268379	5.09e-05	0.0084161
Dazl	SE	50284995_50285046_50284237_50284351_50286250_50286322	0.000100121	0.0125126
Pdlim7	SE	55507863_55507880_55507487_55507624_55508779_55508810	6.69e-05	0.00952036
Dbr1	SE	99578440_99578521_99576575_99576700_99579356_99579442	0.000237451	0.022364
Lsr	SE	30962810_30962867_30962097_30962244_30965968_30966088	0.0385123	0.598743
Map3k14	SE	103242114_103242389_103241036_103241106_103267337_103267472	0.0342989	0.554931
Tpm1	SE	67047785_67047911_67035994_67036128_67048123_67048249	2.03e-11	4.41e-08
Cped1	SE	22215511_22215629_22145518_22145687_22233444_22233665	0.0292875	0.506195
Rfx3	SE	27806187_27806342_27802381_27802479_27806792_27806908	0.0431083	0.639604
Clec4n	SE	123232092_123232194_123229856_123230043_123235443_123235595	0.0171525	0.362303
Arhgap27	SE	103339024_103339108_103338687_103338755_103339195_103339276	5.23e-05	0.00849698
Phtf1	SE	103991319_103991406_103991037_103991211_103993680_103993902	4.07e-05	0.00714188
Numb	SE	83825258_83825291_83811285_83811360_83831921_83831996	0.020876	0.409454
Cox7b2	SE	71503450_71503513_71442823_71443269_71548172_71548205	0.00515655	0.169818
Klrb1a	SE	128620251_128620350_128619099_128619174_128622730_128622934	0.0372615	0.587732
Slc33a1	SE	63953813_63954004_63948071_63948256_63963415_63964768	0.0160211	0.350953
Thyn1	SE	27006800_27006951_27006351_27006447_27007157_27007334	3.71e-12	1.03e-08
Fam208b	SE	3581751_3582193_3573486_3577200_3588297_3588534	0.0476854	0.678595
Stk16	SE	75213132_75213228_75212885_75213006_75213575_75213697	0.0101495	0.262433
Picalm	SE	90182218_90182368_90177499_90177603_90189149_90189257	0.0159457	0.350339
Brpf1	SE	113319667_113319952_113319037_113319361_113320433_113320581	0.0218506	0.423038
Endov	SE	119499845_119499885_119499526_119499661_119500590_119500703	0.0046735	0.160269
Tfdp2	SE	96273865_96273942_96223093_96223198_96290579_96290627	0.00868428	0.237783
Spata1	SE	146487199_146487419_146481766_146481860_146487511_146487565	0.00681092	0.204286
Ptprs	SE	56425326_56425926_56424879_56424977_56426386_56426504	0.0139624	0.322573
Cyp39a1	SE	43682947_43683097_43680123_43680298_43685185_43685276	0.0239748	0.447289
Ints7	SE	191582398_191582528_191575635_191575951_191583178_191583325	0.00241851	0.104652
Csf2ra	SE	61225791_61225821_61225522_61225652_61225927_61226055	0.000340048	0.0284531
Rtel1	SE	181355008_181355125_181354352_181354442_181355327_181355552	8.61e-08	6.22e-05
9330179D12Rik	SE	127185368_127185574_127149388_127149563_127211499_127212119	0.0297357	0.510773
Tmbim6	SE	99399656_99399871_99393694_99393730_99401579_99401663	2.4e-05	0.00538534
9530077C05Rik	SE	22430355_22430499_22411512_22411749_22431675_22431808	0.000422176	0.0330972
Lrig1	SE	94607291_94607438_94606102_94606363_94608039_94608165	0.000288168	0.0254214
Ltbp1	SE	75348743_75348869_75327196_75327322_75359289_75359469	0.0363719	0.576978
Zfp410	SE	84329801_84329952_84327278_84327470_84337615_84337741	0.0118935	0.290206
Atrx	SE	105874559_105877573_105867850_105867923_105878366_105878434	0.0342242	0.554642
Rabl3	SE	37559994_37560109_37556820_37556950_37563615_37563766	0.000257144	0.0235366
Zscan21	SE	138124977_138125690_138117040_138117920_138126453_138126646	0.0014403	0.0754842
Ddx59	SE	136434505_136434634_136433712_136433865_136439752_136440158	0.0032727	0.125107
Spry1	SE	37640519_37640808_37639957_37640105_37642554_37644598	0.00809373	0.228767
Rhpn1	SE	75713001_75713078_75712256_75712451_75713218_75713365	0.013822	0.320801
Calml4	SE	62868676_62868817_62858241_62858272_62875476_62875921	0.000264574	0.0241035
Gm14207	SE	119325167_119325329_119321342_119321666_119325498_119325543	0.000770476	0.0495749
Zfp286	SE	62783671_62783761_62778386_62780899_62787958_62788044	0.00668621	0.201475
Ndufaf6	SE	11066650_11066707_11062049_11062152_11070199_11070322	0.000769114	0.0495749
Cdc42bpa	SE	180093943_180094186_180084371_180084505_180094380_180094491	0.00108245	0.0633738
Porcn	SE	8197974_8198085_8193847_8194277_8199066_8199152	0.0355893	0.569663
1700088E04Rik	SE	79136306_79136489_79135636_79135765_79139237_79139300	4.01e-05	0.0070998
Slc38a10	SE	120147720_120147838_120141599_120141645_120150979_120151346	0.000691814	0.0464431
Tcl1	SE	105218222_105218292_105216749_105217701_105218658_105218829	0.0115247	0.285623
Agap1	SE	89766305_89766464_89743727_89743896_89789162_89789324	0.00171823	0.083813
Larp4b	SE	9158550_9158802_9158122_9158229_9164674_9164720	0.000426349	0.0332484
Mbnl3	SE	51164417_51164664_51139203_51139368_51205773_51205990	3.77e-05	0.00693415
Ada	SE	163730011_163730076_163728116_163728246_163730297_163730399	0.000821014	0.0524803
Chd6	SE	160956082_160956202_160946977_160950187_160957035_160957227	0.0280026	0.49228
Ppig	SE	69731745_69731813_69723092_69723363_69732196_69732274	0.0291923	0.50535
Osr2	SE	35300188_35300955_35296097_35296467_35301911_35302011	0.0191768	0.389044
Sfi1	SE	3143694_3143790_3143259_3143336_3144216_3144292	0.0140576	0.322964
Wnk1	SE	119953770_119954232_119952684_119952969_119956070_119956196	2.45e-06	0.000974672
Pml	SE	58246974_58247438_58234352_58234933_58249540_58249786	0.0484134	0.685146
Rad52	SE	119911047_119911141_119902702_119902835_119918586_119918786	0.00257729	0.107595
Sfi1	SE	3153431_3153498_3146161_3146292_3164556_3164713	0.033281	0.547637
Zfp369	SE	65284920_65285016_65280261_65280388_65291822_65292305	2.74e-05	0.00592581
Susd3	SE	49240482_49240671_49238788_49238936_49248044_49248294	0.0316345	0.53122
1600002H07Rik	SE	24219730_24220133_24219152_24219206_24220251_24220310	0.00566678	0.181987
B3gnt5	SE	19765500_19765621_19765107_19765214_19768743_19772233	0.0135131	0.315889
Rgl2	SE	33935739_33936033_33935544_33935656_33936862_33936977	0.010813	0.276292
Zfp207	SE	80393083_80393176_80391834_80391992_80394285_80394531	0.0454743	0.65709
Trmt2b	SE	134263726_134263861_134262784_134262884_134266260_134266315	0.00164905	0.081806
Rnf185	SE	3428883_3428902_3426565_3426678_3452208_3452363	5.83e-08	4.5e-05
Lcorl	SE	45747055_45747307_45735730_45735824_45775391_45775521	0.00535554	0.174647
9530077C05Rik	SE	22424112_22424807_22411512_22411749_22431675_22431808	0.00109989	0.0640106
Adora1	SE	134234014_134234412_134199224_134203590_134235227_134235431	0.0267465	0.479273
Tada2a	SE	84118247_84118307_84109953_84110045_84126987_84127095	0.0091325	0.245922
Thnsl2	SE	71141219_71141454_71139748_71139943_71144290_71144439	0.00719196	0.211166
A830052D11Rik	SE	32371429_32371583_32359056_32359435_32377687_32378284	0.00742646	0.21442
Mapk8ip3	SE	24917994_24918136_24914458_24914705_24923815_24923907	0.00609849	0.189325
Kif20b	SE	34972396_34972498_34969919_34970117_34972858_34973009	0.0254426	0.465319
Smim22	SE	5007743_5007888_5007336_5007418_5007971_5008069	0.00899288	0.243507
Mapk8ip3	SE	24918087_24918139_24914458_24914705_24923815_24923907	0.0151245	0.3401
Zfp72	SE	74374967_74375063_74371425_74372827_74376435_74376566	0.0308909	0.524554
Rad50	SE	53701956_53702108_53695282_53695411_53705984_53706068	0.00066655	0.0455517
Ncoa7	SE	30647966_30648040_30646311_30647651_30648444_30648540	0.0125415	0.301862
Rftn2	SE	55214119_55214303_55206335_55206615_55226120_55226782	0.00456702	0.157926
Rftn2	SE	55214119_55214303_55211149_55211261_55226120_55226782	0.000183727	0.0187536
Mdm1	SE	118156833_118156863_118152174_118152274_118157194_118157370	0.0137048	0.31884
Terb2	SE	122190606_122190668_122186463_122186545_122193231_122193305	0.000352167	0.0293412
Heatr5b	SE	78761999_78762266_78760415_78760640_78762932_78763077	0.001808	0.0872493
Terb2	SE	122187909_122188049_122186463_122186545_122193231_122193305	0.0447015	0.6514
Myo9a	SE	59875201_59875414_59874601_59874683_59884479_59884592	0.0022537	0.0998596
Rab7b	SE	131698415_131698631_131697828_131697955_131711619_131715439	3.95e-05	0.0070998
Myo9a	SE	59790035_59790092_59788414_59788514_59801913_59802011	0.00120379	0.0670546
Tcirg1	SE	3898717_3898875_3898547_3898638_3898979_3899119	0.000920957	0.0574923
Ube2k	SE	65571531_65571590_65537232_65537546_65581385_65581468	5.97e-05	0.00916814
Adamts16	SE	70763414_70763553_70753173_70753300_70767797_70768042	0.019274	0.39061
Adamts16	SE	70770152_70770283_70768599_70768723_70771982_70772155	0.0112067	0.281899
Gm10644	SE	83934858_83935070_83932328_83934606_83935731_83935828	0.00140782	0.0744174
Sdccag3	SE	26388491_26388560_26387555_26387671_26388915_26389065	0.0179138	0.372894
C2cd3	SE	100399667_100399815_100395754_100395844_100405957_100406106	0.0217608	0.421719
Med25	SE	44880566_44880638_44880251_44880470_44880922_44881111	0.000110953	0.0136047
Gm11639	SE	105044884_105044989_105043335_105043389_105046504_105046558	0.00657212	0.200203
Pstk	SE	131373535_131373830_131371140_131371389_131374064_131374263	7.83e-12	1.91e-08
Slc25a47	SE	108854215_108854398_108853702_108853774_108855293_108855618	0.000277994	0.0247023
Tfdp2	SE	96273838_96273942_96223093_96223198_96290579_96290627	0.0449151	0.652508
Usp16	SE	87473106_87473185_87472080_87472168_87474581_87474673	0.000298945	0.0260189
Myrip	SE	120419650_120419731_120417139_120417276_120422179_120422277	0.00754035	0.216505
Josd2	SE	44468305_44468417_44468071_44468190_44468806_44468969	0.0477322	0.678765
Zfp280c	SE	48543584_48543703_48543404_48543441_48547264_48547327	0.000315731	0.0268798
Dcbld1	SE	52304586_52304720_52290850_52290923_52311399_52311440	0.0255495	0.466398
Ube3a	SE	59243349_59243469_59240966_59241033_59247172_59247217	0.00226925	0.10032
Zfp467	SE	48443411_48443487_48442624_48442738_48445352_48445464	0.00100755	0.0613763
Dnm2	SE	21490657_21490669_21489742_21489794_21494503_21494617	0.00558319	0.180514
Mapk10	SE	102976354_102976426_102966445_102966628_102989619_102989785	1.25e-05	0.00332497
St6galnac3	SE	153509302_153509497_153411461_153411871_153725044_153725174	0.0198999	0.398326
Rnf185	SE	3432399_3432620_3426565_3426678_3452208_3452363	0.00102529	0.0618858
Amn1	SE	149183393_149183538_149170832_149171050_149188605_149188712	0.00373851	0.138042
Secisbp2	SE	51654385_51654635_51652606_51652755_51655098_51655240	0.0287676	0.500315
Sytl4	SE	133941241_133941341_133936384_133938050_133943559_133943668	0.00943882	0.250207
1700061G19Rik	SE	56884750_56884968_56883626_56883860_56885083_56885223	1.41e-07	9.47e-05
Arid5a	SE	36317203_36317324_36316208_36316327_36317609_36317662	0.00733809	0.213847
Serac1	SE	6069298_6069388_6067528_6067660_6070752_6070889	0.000558798	0.0408236
Cyba	SE	122426935_122427019_122426185_122426267_122427228_122427303	0.00139627	0.0741736
Pld3	SE	27545187_27545262_27542743_27542904_27552997_27553212	0.00469422	0.160269
Orc6	SE	85301108_85301238_85299790_85299992_85302795_85302959	2.26e-06	0.000919425
Naaa	SE	92276918_92277077_92272443_92272570_92277911_92278165	0.00248776	0.10613
Trim30d	SE	104479707_104479730_104473178_104473282_104483331_104483562	0.024754	0.455287
Aak1	SE	86970990_86971086_86967268_86967373_86982541_86982643	2.15e-05	0.0049843
Pvt1	SE	62244718_62244857_62242433_62242561_62249157_62249223	0.00246513	0.105627
Cnot4	SE	35077980_35078178_35064888_35065022_35133501_35133689	0.0167177	0.359347
Dlg1	SE	31846833_31846933_31842769_31842839_31847635_31847669	0.0181761	0.375724
Zfp956	SE	47957475_47957602_47955816_47956170_47962524_47962632	3.06e-05	0.00641484
Map3k7	SE	31994873_31994954_31992386_31992516_32002088_32002153	0.00505639	0.167884
Dyrk1a	SE	94611418_94611504_94570009_94570534_94659496_94659693	0.00132107	0.0710071
Ccdc138	SE	58509504_58509632_58507520_58507641_58513078_58513257	0.0313248	0.528294
Nnt	SE	119374628_119374774_119372395_119372591_119381675_119381863	0.000102806	0.0127663
Nup153	SE	46689058_46689250_46686622_46687498_46693511_46694117	0.010073	0.261496
Rsbn1	SE	103928350_103929024_103914150_103915153_103953636_103953774	0.00446024	0.155837
Ap2b1	SE	83364794_83364836_83350978_83351171_83365646_83365793	0.0162272	0.354839
Cttnbp2	SE	18406455_18406551_18405183_18405263_18408481_18408757	0.00421624	0.151381
2810403D21Rik	SE	108871471_108871598_108836228_108836355_108901463_108901555	0.00308348	0.120283
Cenpc1	SE	86058154_86058246_86052170_86052241_86062003_86062047	0.0219543	0.424203
Ap5m1	SE	49078694_49078922_49073548_49074194_49080235_49080375	0.0355553	0.569586
D830044I16Rik	SE	126974678_126974712_126974452_126974510_126974939_126975084	0.00144612	0.0755455
Calml4	SE	62871265_62871454_62858241_62858272_62875476_62875914	0.00464111	0.159582
Gas5	SE	161037123_161037164_161036819_161036852_161037287_161037315	0.0033425	0.127276
Gas5	SE	161036819_161037315_161035982_161036244_161037504_161037531	0.0209135	0.409779
Nr2c2ap	SE	70132411_70132517_70131917_70132008_70132586_70132654	0.0429883	0.638796
Itgb3	SE	104623410_104623496_104607999_104608164_104632173_104632369	0.0284906	0.497113
Cd47	SE	49869017_49869080_49867764_49868112_49884164_49884254	0.0144684	0.329143
Cd47	SE	49906780_49906812_49898039_49898132_49910868_49915010	3.45e-07	0.000216788
9230110C19Rik	SE	8023899_8023966_8021671_8022544_8025961_8026134	0.0118132	0.289048
Vars2	SE	35660213_35660284_35660001_35660127_35660403_35660509	0.0366659	0.580697
Slc9b1	SE	135348326_135348773_135348033_135348122_135355010_135355071	0.00114579	0.0658911
Arap1	SE	101384861_101385040_101378189_101378532_101385551_101385616	0.0497119	0.695253
Arhgap12	SE	6111684_6112439_6069830_6070091_6135803_6135907	2.89e-06	0.00112755
Oxnad1	SE	32099388_32099631_32096486_32096628_32100985_32101094	0.000486397	0.0371875
Ufsp2	SE	45984040_45984233_45980572_45980639_45991747_45991912	0.0223571	0.428588
Sdhc	SE	171135992_171136156_171127164_171129905_171138693_171138755	3.43e-05	0.00666641
Egfl7	SE	26592117_26592280_26591663_26591728_26592417_26592681	0.0455542	0.65709
Cep164	SE	45803172_45803328_45802642_45802777_45809703_45809908	0.00291893	0.116375
Syce3	SE	89397325_89397434_89390173_89390439_89410190_89410263	0.000362147	0.0296656
Kdm6b	SE	69408663_69408781_69408257_69408401_69413532_69413675	0.0123722	0.298896
Sfpq	SE	127022815_127023004_127021323_127022220_127025854_127026051	1.75e-05	0.00437337
Pcgf2	SE	97699205_97699300_97693415_97693568_97699535_97699648	0.00866843	0.237783
Gm44965	SE	48594790_48594976_48593940_48594052_48613177_48613251	0.00510911	0.16854
Inhba	SE	16014450_16014532_16012199_16012386_16017181_16017683	0.000935562	0.0580883
4933431E20Rik	SE	107894860_107894992_107894050_107894228_107895642_107895774	0.00259997	0.108079
Ece1	SE	137905069_137905155_137862236_137862381_137913767_137913854	0.0179772	0.372894
Adar	SE	89734841_89736273_89715021_89715150_89737989_89738173	0.00708214	0.209838
Pcyt2	SE	120613029_120613083_120612462_120612601_120613378_120613423	0.00639017	0.195271
Tpd52l1	SE	31338184_31338245_31332375_31332969_31341139_31341178	0.00961463	0.253307
Metap1d	SE	71522532_71522630_71515636_71515800_71523801_71523849	0.00831326	0.232231
Kitl	SE	100080856_100080940_100079973_100080130_100087346_100087456	0.00161545	0.0812743
Mgrn1	SE	4934194_4934239_4932199_4932298_4936895_4938296	0.00456864	0.157926
Polk	SE	96496602_96496842_96495407_96495532_96501518_96501672	0.000975535	0.0596208
Ccdc60	SE	116180803_116180911_116172441_116172549_116190059_116190230	0.00293039	0.116594
Fshr	SE	89009266_89009344_89001894_89001963_89045070_89045145	0.00266547	0.109566
B230208H11Rik	SE	12922365_12922458_12921608_12921717_12922573_12923090	0.00142089	0.0748692
Ankrd26	SE	118540450_118540549_118539846_118539875_118542889_118542983	0.033611	0.549988
1700001L05Rik	SE	83363819_83363928_83357559_83358950_83365028_83365510	0.00280551	0.114149
Pafah2	SE	134405005_134405102_134404092_134404243_134410903_134410972	0.000357254	0.0295243
Stac3	SE	127507945_127507997_127507698_127507784_127508080_127508218	0.00860522	0.237118
Adam33	SE	131053222_131053300_131053041_131053150_131053389_131053588	0.0452609	0.657041
Oma1	SE	103321639_103321868_103319021_103319528_103325018_103325192	0.0413443	0.620515
Bcorl1	SE	48367768_48371032_48361532_48361662_48375022_48375188	0.00455835	0.157926
Denr	SE	123915190_123915210_123908099_123908214_123922179_123922263	0.0122087	0.296256
Polq	SE	37089269_37089381_37086507_37086692_37091030_37091155	0.0173959	0.365988
Gm595	SE	48873430_48873541_48872846_48872964_48874166_48874308	9.9e-05	0.0124462
Nfya	SE	48398981_48399068_48395649_48395796_48400437_48400580	0.0254747	0.465468
Kifc3	SE	95126525_95126707_95110693_95110759_95134716_95134859	0.013795	0.320557
Lpcat2	SE	92873047_92873108_92871137_92871250_92874232_92874291	0.0143293	0.328468
Unc13b	SE	43161442_43161478_43101800_43101874_43165743_43165978	0.0497951	0.695918
Zfp707	SE	75973122_75973208_75969178_75969404_75973541_75973655	0.0454743	0.65709
Accs	SE	93842548_93842615_93841864_93841962_93842918_93842988	0.000830961	0.0529425
3010001F23Rik	SE	152385644_152385752_152369841_152370022_152403312_152403477	0.0275554	0.487523
Melk	SE	44324199_44324268_44318023_44318122_44332879_44332966	1.11e-06	0.00057081
Rars2	SE	34633657_34633713_34630472_34630570_34645696_34645855	0.0129047	0.307943
Slc25a44	SE	88415987_88416115_88410498_88412897_88420500_88421138	0.0020613	0.094781
B3galnt2	SE	13987352_13987463_13980600_13980696_13990788_13990867	2.2e-05	0.00501523
Ddi2	SE	141689269_141689331_141677548_141685631_141692254_141692444	0.0330796	0.547006
Efna5	SE	62613315_62613396_62604183_62607463_62613836_62613902	0.0279584	0.492149
Akr1cl	SE	65021382_65021505_65016066_65016232_65024662_65024779	0.00397942	0.144406
Stk17b	SE	53776516_53776679_53771609_53771822_53785073_53785224	0.000962983	0.0592988
M1ap	SE	83028391_83028532_83026197_83026404_83029769_83030183	0.000715506	0.0472865
Calml4	SE	62868676_62868817_62858241_62858272_62871265_62871454	0.0269337	0.48086
Gbp9	SE	105081650_105081753_105081129_105081323_105082703_105082910	0.042594	0.634872
Abca8b	SE	109955034_109955201_109953497_109953631_109957062_109957258	0.00217576	0.097514
Echdc2	SE	108169714_108169782_108165436_108165661_108169860_108169948	0.0303163	0.517553
S100pbp	SE	129183600_129183717_129181741_129182532_129189371_129189542	0.0269056	0.480798
Trabd	SE	89084902_89085042_89084697_89084808_89085273_89085446	0.00019821	0.0199191
Immt	SE	71853172_71853268_71852729_71852867_71856911_71857048	0.00280541	0.114149
Lmln	SE	33074004_33074183_33069880_33069998_33080930_33081036	0.00609498	0.189325
Slc1a6	SE	78795923_78796267_78791164_78791369_78800028_78800262	0.0394875	0.60618
Slc1a6	SE	78793289_78793332_78791164_78791369_78800028_78800262	0.00931267	0.249373
Arfrp1	SE	181361000_181361071_181359638_181359739_181361390_181361472	0.01133	0.283192
Marveld2	SE	100607776_100607812_100600888_100601037_100611432_100612584	0.00209782	0.0951142
Fibp	SE	5464333_5464431_5464128_5464215_5464924_5465052	0.00119386	0.0666922
Yeats2	SE	20207623_20207793_20206083_20206245_20208418_20208577	0.00341691	0.129856
2610021A01Rik	SE	41603435_41603534_41599229_41599400_41611675_41611919	0.0498658	0.696407
Cnnm2	SE	46871655_46871721_46868537_46868631_46877207_46877392	7.75e-05	0.0104813
Zfp820	SE	21823843_21823891_21821069_21821196_21845643_21845759	0.000565109	0.0409568
Rad52	SE	119915966_119916042_119902702_119902835_119918586_119918786	0.00552883	0.179351
Tmtc2	SE	105271498_105271580_105254794_105254909_105303593_105303715	0.00213509	0.0961332
Fam185a	SE	21438699_21438838_21433690_21433783_21447315_21447357	0.00907458	0.245379
Cep152	SE	125571668_125571833_125569554_125569651_125576713_125576855	4.36e-05	0.00745508
Lmf1	SE	25585542_25585852_25579176_25579379_25612295_25612444	0.0113757	0.283607
Cdk5rap2	SE	70353609_70353651_70337340_70337559_70354712_70354875	0.00764625	0.219222
Rbm34	SE	126961911_126961971_126959541_126959585_126965381_126965622	0.0398822	0.607817
Camta2	SE	70683278_70683365_70682893_70683047_70683889_70684025	0.00231675	0.101367
Map4k4	SE	40003756_40003987_39997020_39997182_40004806_40004913	0.000241778	0.022662
Rab4b	SE	27176157_27176238_27175778_27175893_27178726_27178896	0.00157245	0.0798346
Trip11	SE	101905754_101905816_101902231_101902342_101912689_101913267	0.00613367	0.189813
Fmr1nb	SE	68768955_68769093_68763931_68764009_68772044_68772141	0.00228453	0.100768
Fmr1nb	SE	68772044_68772141_68763931_68764009_68803604_68803693	0.022686	0.432765
Mcm10	SE	4993742_4993856_4992094_4992137_4994569_4994682	0.000357394	0.0295243
Dram2	SE	106555163_106555308_106552155_106552280_106561748_106561816	0.0140643	0.322964
Htra2	SE	83052697_83052803_83052472_83052542_83053037_83053070	0.0219909	0.42449
Bmpr1b	SE	141981920_141982013_141880356_141880516_142169144_142169425	0.00190369	0.0898652
Efs	SE	54920902_54921181_54920504_54920645_54925437_54926788	0.00743474	0.21442
Ska2	SE	87116103_87116190_87109233_87109304_87121933_87124635	0.0283423	0.495571
Zc3hc1	SE	30369932_30369976_30366387_30366745_30370264_30370471	1.96e-05	0.0047224
Magi3	SE	104016601_104016692_104013258_104016068_104017500_104017639	0.0440236	0.645798
Mapk12	SE	89135426_89135456_89135122_89135170_89135576_89135688	0.032769	0.544626
Nme6	SE	109835317_109835414_109833041_109833295_109839607_109839710	0.0340305	0.552422
Trub2	SE	29778731_29778868_29776109_29777956_29779822_29779895	0.0230587	0.436883
Dicer1	SE	104723901_104724070_104714773_104714906_104728332_104728493	0.000390265	0.0314405
Zfp961	SE	71966099_71966160_71965793_71965920_71967898_71970333	0.00319842	0.123535
Brpf1	SE	113309802_113310408_113307191_113307569_113314590_113315550	0.00388899	0.141984
Chn1	SE	73679614_73679903_73659679_73659757_73706918_73707032	0.00013137	0.0149777
9230114K14Rik	SE	52192917_52193596_52190678_52190937_52194800_52194890	0.000289975	0.0254655
9230114K14Rik	SE	52192917_52192978_52190671_52190937_52194800_52194890	0.0117617	0.289048
Galnt6	SE	100699116_100699234_100697777_100697978_100703347_100703582	0.03612	0.574854
Tpcn1	SE	120545074_120545128_120544412_120544485_120545257_120545314	0.0242157	0.449887
Tnnt3	SE	142502739_142502757_142501828_142501842_142504047_142504065	0.0168612	0.360446
Cyp4f13	SE	32946804_32947003_32941055_32941200_32947312_32947402	0.00478157	0.161394
Kazald1	SE	45076640_45077213_45076194_45076236_45078295_45078456	0.00197492	0.0916739
Fam172a	SE	77951984_77952104_77902653_77902875_77999585_77999702	1.21e-05	0.00328453
Tcea3	SE	136253745_136253808_136247951_136248117_136255149_136255288	0.035757	0.570593
Hk3	SE	55008674_55008774_55007071_55007255_55008952_55009048	0.0384887	0.598743
Eml2	SE	19201829_19201927_19201564_19201653_19202508_19202596	4.9e-05	0.00817046
Zfp961	SE	71966099_71966160_71951070_71951160_71967898_71970333	0.0234071	0.44057
Cilp	SE	65265812_65265850_65265179_65265223_65267041_65267192	0.00841605	0.234065
Stx17	SE	48158810_48159033_48140419_48140485_48166927_48167043	0.0083841	0.233509
Clasp2	SE	113875264_113875327_113870622_113870730_113876243_113876350	0.00209319	0.0951142
Gm42890	SE	105981232_105981349_105980091_105980277_105984572_105984600	0.00578124	0.182798
Nme5	SE	34569797_34569898_34567035_34567154_34571455_34571661	0.019673	0.395379
Sned1	SE	93275296_93275470_93274604_93274718_93280480_93280594	0.0463613	0.665582
Grk4	SE	34719700_34719891_34716188_34716329_34745162_34745371	0.0439633	0.645798
4933431E20Rik	SE	107894588_107894656_107894050_107894215_107894860_107894992	0.00102285	0.0618858
Mettl10	SE	132837099_132837207_132827456_132827882_132850594_132850709	0.000312954	0.0267603
Zfp961	SE	71965793_71965920_71951070_71951160_71966099_71966160	1.34e-14	5.24e-11
Zfp961	SE	71965793_71965920_71951070_71951160_71967898_71970333	3.81e-06	0.00140468
Arhgap17	SE	123331225_123331265_123327238_123327343_123369753_123369878	7.31e-05	0.010329
Hmgn5	SE	109011421_109011445_109010553_109010607_109013251_109013404	0.00171959	0.083813
Arhgap17	SE	123285419_123285467_123279274_123280116_123286497_123287013	7.43e-06	0.00233742
Zfp638	SE	83976201_83977429_83972245_83972283_83978021_83978087	1.49e-06	0.000725977
Map7d1	RI	126236895_126237278_126236895_126237059_126237155_126237278	0.0010255	0.0135367
Pdcd4	RI	53929082_53929861_53929082_53929192_53929716_53929861	0.00220954	0.024305
Gas5	RI	161035982_161037315_161035982_161036244_161036819_161037315	3.61e-05	0.00119202
Gas5	RI	161035982_161037315_161035982_161036014_161036819_161037315	0.000312332	0.00687131
Gas5	RI	161036819_161037164_161036819_161036852_161037123_161037164	0.0344342	0.269486
Btbd9	RI	30215523_30220570_30215523_30220144_30220344_30220570	0.0441275	0.291241
