# Supplementary material for: Sertoli cell-only phenotype and scRNA-seq reveal hnRNPU as a regulator required for spermatogonial stem cell pool establishment in mice
Source: Research Square preprint supplement (doi:10.21203/rs.3.rs-2254778/v1), 2022-11-11
Supplement: Supplementary file 2 [file 4171a44a3ebf0cb92bab6b38.xlsx]

## Sheet: Sheet1
Table S3. Primers used in this study.
Target	Sequence(5’-3’)	Application
Vasa-Cre-F	5’-GCCTGCATTACCGGTCGATGC-3’	Genotyping
Vasa-Cre-R	5’-CAGGGTGTTATAAGCAATCCC-3’
Hnrnpu-loxP-F	5’-TCAGCAGCGAATGGTATCAA-3’
Hnrnpu-loxP-R	5’-GAAAGCAGCCATGTTTTACACTT-3’
Hnrnpu-loxP-Del	5’-TTCCCAATTATGCCAATTCC-3’
Hnrnpu-F	5’-TCCCCTTAGAGGACCGAGTT -3’	RIP-qPCR/RIP-PCR
Hnrnpu-R	5’-GGGTTTTCAGCTGCATGTTT-3’
Gapdh-F	5’- AGGTCGGTGTGAACGGATTTG-3’
Gapdh-R	5’- GGGGTCGTGATGGCAACA-3
Cdh1-F	5’-CGTCCTGCCAATCCTGATGAAAT-3’
Cdh1-R	5’-CGAACACCAACAGAGAGTCG-3’
Vrk1-F	5’-CCGAAGTGTGGAGTCCCAAG-3’
Vrk1-R	5’-TTCGTGAACCCCTACGGTCT-3
Slx4-F	5’-GGCCCTGATTTTACCAGGTGG-3’
Slx4-R	5’-GGCTGCTGTTTCCTTGATGG-3’
Dazl-F	5’-TCCTCCTTATCCAAGTTCACCA-3’
Dazl-R	5’-TCAGCTCCTGGATCAACTTCAC-3’
Ddx5-F	5’-CGGGATCGAGGGTTTGGTG-3’
Ddx5-R	5’-GCAGCTCATCAAGATTCCACTTC-3’
Dmrt1-F	5’-GAGAATAATGCCAGCAACCCG-3’
Dmrt1-R	5’-GGTAAAAGCTGCTGTAGTAGGC-3’
Ptpn11-F	5’-AGAGGGAAGAGCAAATGTGTCA-3’
Ptpn11-R	5’-CTGTGTTTCCTTGTCCGACCT-3’
Apbb2-F	5’-AGCAGATCTCCACGGCTCTA-3’
Apbb2-R	5’-TGCATAGCGTAGCGTTGCTC-3’
Zfp707-F	5’-TCCACAGCCTCCAGTTACTA-3’
Zfp707-R	5’-CTGTAGTTGTTGCTGCAGGA-3’
