# Supplementary material for: Sertoli cell-only phenotype and scRNA-seq reveal hnRNPU as a regulator required for spermatogonial stem cell pool establishment in mice
Source: Research Square preprint supplement (doi:10.21203/rs.3.rs-2254778/v1), 2022-11-11
Supplement: Supplementary file 3 [file 5dc3077c4b949eacf4ca6c92.xlsx]

## Sheet: S1 RNA-seq deregulated genes
Table S1. The differential expressed genes identified from P4 testes in hnRNPU cKO mice were detected by RNA-Seq.
Gene	cKO-1	cKO-2	cKO-3	Control-1	Control-2	Control-3	logFC	PValue
Adgb	0.0425984	0.322948	0.695657	0.0653607	0.0296882	0.0803789	2.56846	0.0419194
H60b	2.9356	4.3595	3.3359	1.96481	2.31113	2.72297	0.595994	0.0223962
Rspo3	2.31901	1.81202	1.74604	1.17878	1.20471	0.893207	0.839595	0.00258826
Fam229b	1.21419	1.38742	3.03043	0.971993	0.855405	1.00517	0.987512	0.0170012
Ak9	0.277599	0.452794	0.824246	0.0903494	0.257224	0.272723	1.31952	0.0326212
1700040L02Rik	2.54294	3.48599	7.65393	1.88852	2.58555	2.61724	0.943279	0.0474875
Tmem26	0.661337	0.774051	0.844022	1.13044	1.34633	0.967255	-0.601825	0.0117548
A930033H14Rik	4.23476	4.81944	4.14732	2.81714	2.50761	2.68215	0.716239	0.000211351
Ccdc105	0.230299	0.775977	2.76054	0.314097	0.240754	0.263365	2.18203	0.0479504
Gm45414	0.555715	0.394731	1.05542	0.337991	0.204115	0.309163	1.23237	0.0128568
Ttc41	0.444725	0.506929	0.55254	0.300046	0.178052	0.311639	0.924005	0.00997675
Ntn4	0.9166	0.629562	1.16306	1.178	1.6093	1.72953	-0.73329	0.0164694
Gm22918	30.3734	23.4307	13.8441	58.4586	30.4989	32.4949	-0.845184	0.0386154
1700017N19Rik	0	0.477618	2.71237	0	0	0.0194523	6.89873	0.0497855
Lrriq1	0.308975	0.336345	0.729221	0.194492	0.231898	0.318002	0.882541	0.0389611
Glipr1l2	0.23089	0.606816	1.11975	0.259795	0.144823	0.213873	1.63923	0.013685
Kcnc2	0.454089	0.502039	0.189602	0.696731	0.912322	0.496567	-0.886057	0.0411292
4933416C03Rik	1.11172	2.93753	6.17713	0.758115	0.958293	1.12413	1.83835	0.0348021
Lyz2	17.918	13.3032	20.6553	45.572	42.6539	40.1353	-1.30721	1.72809e-05
Itga7	1.12834	1.26237	1.6914	2.67815	1.95831	1.87163	-0.678159	0.00820391
Fam161a	2.35008	1.96108	4.65191	1.67761	1.37997	1.63652	0.932426	0.0272714
Tenm2	0.0689653	0.0852037	0.121346	0.188119	0.188251	0.134074	-0.893337	0.0183486
Psme2b	2.25848	2.22984	3.32694	3.27725	3.78859	4.75705	-0.595728	0.0420221
Cdkl3	2.80501	3.59812	5.08972	2.47493	2.58081	2.47334	0.604344	0.010912
Obscn	0.0304253	0.0968776	0.0647428	0.0124488	0.0238549	0.0391429	1.33157	0.02189
Med9os	2.33572	3.96312	11.9715	2.13322	2.18014	1.45955	1.64876	0.0304745
Lrrc48	0.36967	0.491675	1.10725	0.308478	0.355943	0.370459	0.921627	0.0393187
Rps13-ps5	8.09818	6.43176	5.53419	1.47922	3.93056	4.46507	1.02447	0.0211879
Trim16	0.461943	0.301569	0.390525	0.492209	0.724371	0.683445	-0.714673	0.0258486
Fbxw10	0.141988	0.375373	1.41611	0.122894	0.125598	0.146136	2.27556	0.037339
Tvp23bos	2.17416	2.90097	2.79739	1.77916	1.591	1.43212	0.703401	0.0169794
Tekt3	0.276646	0.966035	6.32242	0.0771765	0.0525827	0.0517689	5.30221	0.024515
Dnah9	0.115768	0.119808	0.158229	0.0817655	0.0633934	0.0936184	0.718232	0.0294349
Usp43	0.222356	0.290319	0.29343	0.180062	0.145281	0.152568	0.743467	0.0376321
Cd68	3.42739	2.61606	3.01144	5.72387	5.19168	5.25531	-0.835777	0.000895378
Bcl6b	1.07569	1.08734	0.842359	1.60817	1.7424	2.01959	-0.838157	0.000922477
Cdk5r1	0.253502	0.67265	0.522708	0.248503	0.287095	0.282652	0.808049	0.0461006
Cct6b	0.610903	0.973779	3.60453	0.360515	0.221067	0.411108	2.37299	0.0156971
Hsf5	0.1163	0.320618	0.899922	0.162223	0.0994747	0.0544084	2.05448	0.0337634
Spata20	0.107074	0.572091	3.05813	0.125172	0.0639628	0.0787161	3.76525	0.0486308
Nxph3	2.36668	1.20674	1.78269	3.10643	2.5398	2.86695	-0.662498	0.0248897
Srcin1	0.482942	0.683441	0.509849	0.2964	0.423126	0.350304	0.638888	0.0128126
Pnmt	3.46664	4.19731	2.9409	1.01315	1.71245	1.41149	1.34947	0.000410761
Hap1	19.3309	33.9713	17.0413	13.469	15.9862	15.042	0.649059	0.0454649
Arl4d	3.59454	3.1833	4.3762	5.499	5.38718	5.9586	-0.594811	0.00571447
1700006E09Rik	0.275448	2.61725	8.77837	0.225404	0	0.113399	5.00613	0.0308185
E130111B04Rik	6.64308	6.71501	5.60798	3.09781	3.77871	2.81531	0.961041	0.00316551
Meioc	0.590471	0.924179	1.47987	0.418898	0.577453	0.558714	0.937865	0.0143747
1700023F06Rik	0	0.703901	1.85787	0	0.031651	0.0311612	5.10894	0.0372468
Rprml	1.8281	1.71591	0.68927	2.04806	3.9132	2.06071	-0.925945	0.0491231
Gm11639	0.220949	0.528576	0.57343	0.140628	0.128322	0.141497	1.67473	0.000538124
Efcab3	0.365078	1.04559	2.16798	0.171159	0.159022	0.203529	2.72379	0.0026844
Ace	3.60041	5.19433	5.57971	7.12755	8.85767	5.42576	-0.585445	0.0356157
Cacng4	1.36496	1.61591	1.59436	2.3396	2.63531	1.88578	-0.591666	0.00685947
Abca8a	0.42055	0.403849	0.381547	0.803003	0.549553	0.699755	-0.767955	0.0053076
Cd300a	0.148456	0.178201	0.146932	0.341675	0.223094	0.229191	-0.748138	0.0465112
Cd300c2	0.482715	0.34853	0.477759	1.34023	0.756944	0.887177	-1.18218	0.00910124
Foxj1	0.20112	0.542128	0.879161	0.188582	0.0700836	0.310495	1.49612	0.0365722
Dnah17	0.100867	0.264542	0.326475	0.080868	0.0968962	0.0701445	1.46345	0.00435291
Lgals3bp	1.09634	0.967731	0.993383	1.5637	1.50124	2.03424	-0.735634	0.00437007
Gm11767	2.31846	3.42521	4.05977	1.82427	2.23727	1.65199	0.767266	0.037811
Pfn4	2.28896	2.5179	7.12954	1.65274	0.914923	1.6283	1.50438	0.0197974
Lrfn5	0.497678	0.419223	0.419595	0.24511	0.284222	0.294052	0.6977	0.00675362
Lrrc9	0.256822	0.188212	0.679946	0.183892	0.134241	0.211461	1.08595	0.0474404
Tex21	0.288407	1.10365	7.58472	0.084289	0.129215	0.148417	4.59984	0.0371729
Ppp1r36	5.26926	4.24247	11.6431	3.19635	3.84312	3.15303	1.05114	0.0354732
Asb2	2.6933	2.597	3.04645	6.96994	4.63206	4.21547	-0.928734	0.000851699
Tcl1	0.571857	0.385367	0.848979	0.853055	1.096	1.44689	-0.902633	0.0286633
Bdkrb2	0.418681	0.793528	0.595675	0.214134	0.273555	0.430915	0.962975	0.03724
Jag2	0.856675	1.40306	1.084	0.598984	0.816213	0.79242	0.589611	0.0283921
Ptprn2	0.189093	0.211804	0.237733	0.334569	0.30453	0.315597	-0.582898	0.029233
Abcb5	3.48439	3.66422	2.32558	7.13862	7.02271	4.46466	-0.983134	0.00498943
2810429I04Rik	0.640311	0.75185	0.428892	0.383721	0.358355	0.20636	0.929196	0.0115704
Ryr2	0.378326	0.540667	0.402848	0.248207	0.245484	0.367898	0.61275	0.0130553
Dcdc2a	1.12504	1.40007	1.12925	0.683968	0.870992	0.677271	0.703281	0.00154138
Hdgfl1	0.135475	1.62048	5.69856	0.115481	0.0944166	0.20915	4.11819	0.0449467
Fam50b	0.216382	3.60896	16.2405	0.147558	0.150803	0.185587	5.32663	0.039285
F13a1	1.43292	1.13159	1.41821	2.48487	2.86721	1.325	-0.750825	0.0272034
Mak	0.197303	0.598318	1.80631	0.0882966	0.141804	0.164993	2.69998	0.0188988
Gm2830	7.19371	5.30943	9.49313	9.81124	10.1464	13.3975	-0.59635	0.042125
Hk3	0.394006	0.205171	0.295425	0.69614	0.436856	0.528403	-0.886219	0.0252743
Cxcl14	2.04977	1.70633	1.69458	2.61472	2.94954	2.60605	-0.584637	0.0121647
Tgfbi	16.2352	15.4984	15.4836	27.7231	23.5621	23.1975	-0.660853	7.64556e-05
Mir6369	9.12409	15.5112	32.4274	8.90879	6.93695	10.6712	1.09704	0.0328593
1700014D04Rik	0.0669125	0.432878	1.01987	0.0410668	0.0559602	0.0826412	3.03726	0.0155457
Gm5084	4.91386	3.54791	3.47387	6.55225	5.09108	6.3218	-0.587323	0.0177119
BC048507	0	1.70914	4.29281	0.0751976	0	0.151325	4.55233	0.0458511
Tppp	0.979214	0.937722	1.41973	1.5991	1.73305	1.75927	-0.610971	0.00809909
Nr2f1	0.693837	0.439513	0.677558	0.227112	0.183752	0.380859	1.19764	0.00470213
Adgrv1	0.0514647	0.0430527	0.0562056	0.0780572	0.0834845	0.0712335	-0.626791	0.0441749
4933425L06Rik	0.917139	1.3185	1.37167	0.604579	0.27698	0.713197	1.17034	0.00756391
Rps3a3	125.028	105.924	4.43311	2.99788	4.33559	4.43923	4.32028	0.0339019
Fst	1.03461	0.91271	1.11708	1.92418	2.77278	1.39397	-0.995501	0.00456799
1700003P14Rik	0	1.20206	2.20209	0.0392393	0	0.0789634	4.66903	0.0411188
Fgf10	0.410855	0.347697	0.31207	0.254113	0.189782	0.186845	0.757408	0.0302657
Cfap70	0.224138	0.288355	1.25035	0.135478	0.170409	0.0943718	2.12283	0.02334
Myoz1	0.645494	0.343413	0.638867	1.98082	0.994439	1.22381	-1.35869	0.00570979
Tnnc1	2.99834	3.7138	2.17342	1.25272	1.54515	1.99934	0.883734	0.0102459
Grid1	0.158706	0.196885	0.207055	0.0590327	0.0527898	0.155918	1.06527	0.035277
Rec8	0.895868	0.695348	1.42501	0.343643	0.501717	0.707998	0.959118	0.0213921
Cma1	1.10518	0.331006	1.49895	4.73129	4.40745	6.48779	-2.39617	0.00101289
Mcpt4	0.799301	0.134659	0.747145	1.77147	2.5996	4.89023	-2.43275	0.00506578
3110083C13Rik	3.3382	3.1667	3.2531	1.62852	2.25491	2.22002	0.674004	0.0189364
Phf11d	0.596188	0.513729	0.870591	1.54959	1.4815	1.5994	-1.22432	0.000214427
Blk	1.29664	1.68773	1.35365	0.781265	0.649901	0.767812	0.972022	0.00138836
Gm21685	1.18697	1.18882	0.738283	0.590368	0.796882	0.655658	0.603712	0.0182682
Epsti1	1.2902	1.34253	2.51634	1.04803	0.932237	1.17167	0.705379	0.0337586
Lect1	21.7542	15.7207	16.7855	10.5162	10.2986	14.2146	0.635392	0.00391996
Rps3a2	204.266	168.38	7.08689	8.45992	8.47193	9.25487	3.85782	0.0421983
Ednrb	1.16519	1.22184	2.05857	2.61767	2.16296	3.0037	-0.808348	0.0056479
Trim52	0.349893	0.391576	0.383404	0.0639116	0.209016	0.218642	1.18637	0.0195407
Timm8a2	1.15562	1.46016	2.2875	0.492532	0.855722	0.991151	1.06031	0.0202595
Spef2	0.146302	0.103072	0.372969	0.0906982	0.0880586	0.0866957	1.22445	0.0247081
C1qtnf3	28.3678	22.6272	33.5217	40.4309	46.2628	45.1399	-0.641274	0.00134262
Dnah5	0.061878	0.0682343	0.100215	0.0172623	0.0147016	0.0376327	1.71232	0.00279046
Rspo2	0.14548	0.147056	0.104718	0.392322	0.456255	0.517253	-1.77109	0.000321625
Gm15943	0.46021	0.546602	0.307452	0.729659	0.649488	0.805216	-0.73555	0.0213168
Klhl38	0.317986	0.401787	0.295051	0.75218	0.789502	0.940921	-1.28863	0.00127711
Gml	1.64093	2.27588	1.964	0.819733	1.27659	1.37466	0.753476	0.025737
Cyp11b1	1.00007	1.53039	0.976058	0.468863	0.421094	0.357394	1.47652	0.000219686
Shisa8	1.51087	0.443391	1.44712	2.91645	2.39467	3.18528	-1.30798	0.0142206
Nfam1	0.109153	0.262047	0.135041	0.446611	0.271008	0.322985	-1.04563	0.0292456
Tspo	2.59335	2.79056	2.02854	3.80796	3.80427	4.13284	-0.666458	0.00954525
Pdzrn4	0.610139	0.606112	0.70799	0.398139	0.362908	0.508869	0.597712	0.0336483
Col2a1	0.315005	0.622023	0.500284	0.112402	0.0995576	0.180954	1.85644	0.000275159
4930451G09Rik	0.458348	0.604319	1.3412	0.346536	0.333326	0.492251	1.03005	0.0349342
2900011O08Rik	2.11089	2.18941	2.52523	1.40819	0.940254	2.07811	0.62608	0.0367133
Tmem191c	5.51095	9.84872	8.93019	5.30555	4.61267	5.17151	0.676999	0.0046182
Tbx1	0.667958	0.500142	0.832496	0.404891	0.284485	0.407393	0.862743	0.0344914
Gp1bb	1.16857	0.944978	1.13344	0.502037	0.684107	0.577302	0.876878	0.0106272
Fetub	0.482589	1.23115	1.20546	0.446626	0.288284	0.520341	1.20207	0.013403
Tmem44	0.747476	1.44062	1.11463	1.42724	1.5524	2.16947	-0.647702	0.0210925
Pla1a	0.3121	0.292946	0.308896	1.09456	0.908892	0.275331	-1.32058	0.0202376
Upk1b	1.29226	1.28113	1.57414	2.03361	2.2602	2.04617	-0.614376	0.0154005
Dppa2	0.338513	0.524674	0.513724	0.0923371	0.23592	0.209042	1.33924	0.0120193
Map3k7cl	4.84322	5.32605	7.47996	10.616	8.45703	9.47647	-0.697269	0.00245392
4930563D23Rik	0	0.470239	2.21991	0	0	0.0170998	6.83799	0.0467905
Rsph3b	15.2531	20.4016	27.0928	15.2959	12.1015	13.9607	0.595528	0.0156723
T2	0.91897	1.43104	0.614551	0.457304	0.727008	0.460129	0.835075	0.0494249
Pde10a	0.118645	0.137567	0.183048	0.232016	0.277247	0.226266	-0.747326	0.0137871
Tcte2	0.112985	0.223226	0.645537	0.0840527	0.107377	0.0528575	1.98883	0.0197151
Zfp994	2.117	1.18379	1.45331	2.35899	2.67456	2.18813	-0.599947	0.0227589
D930048G16Rik	0.310408	0.568707	0.614442	0.337361	0.223094	0.119804	1.11276	0.0321364
Tmem204	8.89232	4.96681	6.84285	12.3429	8.61415	11.2779	-0.633704	0.0297107
Tpsb2	1.05735	0.164431	1.00625	2.45432	2.55082	4.52042	-2.0722	0.00995847
Cdkn1a	0.672376	0.859567	0.665473	0.546172	0.28943	0.305304	0.932231	0.0210407
Psmb9	0.192234	0.145737	0.225934	0.344113	0.339122	0.272045	-0.757481	0.0485691
Btnl7-ps	0.199485	0.100823	0.345515	0.663172	0.886301	1.02657	-1.97479	0.00117804
C4b	0.586668	0.608627	0.282682	0.244779	0.363139	0.246291	0.783105	0.0418446
Cyp21a1	0.390313	0.519131	0.487965	0.819514	0.60131	0.782291	-0.659162	0.0477962
Gm10501	0.999126	2.08049	11.2731	0.551882	0.584911	0.411328	3.19986	0.0433847
Atp6v1g2	4.30858	7.52429	6.46586	3.99518	3.09434	4.07395	0.704081	0.00425104
Gm26917	3.86925	8.68996	6.27362	3.63366	3.39606	3.6697	0.802704	0.0127223
Tmem151b	0.244684	0.201531	0.287018	0.296636	0.369477	0.606265	-0.787456	0.0387688
Trem2	0.479968	0.377351	0.510229	0.763714	0.696886	0.6861	-0.649941	0.0161201
1700061G19Rik	0.136151	0.412875	0.928297	0.123794	0.126517	0.155699	1.84176	0.0151063
Myom1	3.52653	3.80759	3.65909	6.16013	7.20311	5.8153	-0.808169	2.27343e-05
Vit	1.05055	1.19263	1.67962	5.25731	1.7234	2.36211	-1.25748	0.032294
Morn2	5.52932	9.38434	15.8096	5.58611	5.63762	6.25295	0.806561	0.0404093
Nrxn1	0.17599	0.188613	0.201465	0.106277	0.139647	0.120028	0.624109	0.0141256
Psma8	3.0381	3.70095	5.70541	2.41707	2.19878	2.80616	0.741906	0.00996607
Klhl14	0.526545	0.723052	0.422811	0.182921	0.342732	0.337428	0.945741	0.0155414
Nol4	0.0386169	0.281053	0.512154	0.0158005	0.0322961	0.0556434	2.96021	0.015016
Eif4ebp3	1.59538	2.32939	1.63748	1.14838	0.803017	1.33792	0.748056	0.046224
Pcdhb11	1.13411	1.0056	1.43754	0.671623	0.530397	1.10581	0.635884	0.0412679
Arl14epl	0.587775	0.799016	0.702101	0.290251	0.296635	0.479787	0.961551	0.0140935
Tex43	0.0478363	1.88582	7.81195	0.0489317	0	0.098468	5.86962	0.0422323
Ppargc1b	0.484789	0.601411	0.381668	0.326836	0.276435	0.260817	0.754137	0.0261305
Apcdd1	3.20406	2.98473	3.23334	5.01253	6.02584	4.36457	-0.71314	0.000883012
Mppe1	1.29234	1.72702	1.62594	2.55425	2.33565	2.81801	-0.734655	0.00303228
Cbln2	0.51648	0.414587	0.240554	0.714767	0.682849	1.12568	-1.09939	0.00991483
A930001C03Rik	0.569223	0.752429	0.780063	0.425496	0.411968	0.450658	0.697272	0.0403874
Gm21844	1.59137	1.94373	1.18127	2.30606	2.56474	2.86626	-0.715861	0.0368369
1700020D05Rik	0.473631	1.61037	5.24168	0.528519	0.315084	0.5761	2.34787	0.0382197
Ovol1	0.257706	0.398406	0.840197	0.2481	0.142626	0.218429	1.2834	0.0199208
Gm27533	37.0202	53.2082	37.7852	26.3301	22.3739	31.5532	0.667186	0.00731184
Gm27505	61.1465	76.7558	50.63	41.289	32.5879	50.5933	0.594931	0.0172193
Gm14963	0.618692	0.503788	0.544302	0.210953	0.305424	0.442201	0.797604	0.0429219
Ppp1r32	0.180912	0.822918	3.25282	0.185054	0.0945623	0.0930988	3.46388	0.0265807
Ms4a7	0.187574	0.149689	0.185649	0.373641	0.516026	0.25402	-1.1284	0.00923322
Gm9806	1.75209	3.05911	2.67997	0.733177	1.16558	1.96722	0.94547	0.0402949
4430402I18Rik	0.186553	0.475531	1.6216	0.215715	0.144147	0.108524	2.26784	0.0479182
Insl6	4.84322	4.45631	8.97244	2.60409	4.08942	4.28176	0.734593	0.0412054
Gldc	0.679214	1.8348	1.01995	0.431235	0.563142	0.602638	1.12946	0.00705742
Hoga1	2.41312	2.75399	4.91151	2.548	1.5665	1.92281	0.734226	0.034279
Plekhs1	0.681146	0.595479	0.437288	0.169478	0.250186	0.189473	1.48017	0.00188089
B230217O12Rik	2.35604	1.92148	2.01387	1.23238	1.00759	1.5431	0.734682	0.0119501
Slc18a2	0.150276	0.210328	0.205938	0.319259	0.314197	0.428309	-0.904702	0.017343
Nanos1	0.145531	0.192371	0.254834	0.320629	0.351087	0.32261	-0.747423	0.0444663
Sfxn4	0.842288	0.89622	0.921392	1.54177	1.05045	1.52088	-0.629902	0.0166724
Rpl5-ps1	0.934306	1.24266	0.973382	2.1126	1.69641	1.61955	-0.789348	0.0228792
Efhc1	1.05524	1.30817	2.7588	1.0183	0.915816	1.04509	0.776731	0.0469149
Gm7658	2.81604	2.29304	1.31614	0.560102	1.06307	1.40891	1.084	0.0200716
Vwa3b	0.244866	0.338274	1.25215	0.18368	0.119458	0.25202	1.71942	0.0437605
Il1rl1	0.0765214	0.0515667	0.107292	0.150024	0.113327	0.249398	-1.10886	0.0253125
Mettl21c	0.235143	0.248024	0.182136	0.104577	0.0748142	0.063134	1.43501	0.00407813
Sdpr	15.8578	11.1567	17.2616	21.6672	28.6425	20.2756	-0.673771	0.0160079
Gm6644	2.40379	1.72891	2.24185	4.16109	2.94784	2.90222	-0.650596	0.0312854
Aox4	0.188048	0.343209	0.242987	0.128236	0.0819106	0.134405	1.15455	0.00515054
Als2cr12	1.12622	1.67492	3.03649	0.993114	0.866098	0.732783	1.1617	0.00874462
Gm29017	0.483325	0.403592	0.603153	0.816822	0.768884	0.821869	-0.689828	0.0388867
Ica1l	0.746919	0.987318	1.27541	0.730439	0.686442	0.540655	0.611625	0.0252241
Gm8550	3.50077	6.46489	3.73135	2.13478	2.95591	1.66295	1.00275	0.0110168
Spag16	0.110489	0.216801	0.604665	0.0531853	0.067944	0.0468247	2.44828	0.00376811
Asic4	3.28865	4.20422	2.12206	2.34158	2.15715	1.82511	0.595091	0.0293623
Col4a3	6.66458	5.44379	8.15898	11.2883	10.9971	9.85998	-0.667082	0.00146451
Sphkap	0.192292	0.171234	0.357978	0.13113	0.0717933	0.103667	1.22856	0.00777627
Gm7967	0.0221655	0.112028	0.0292505	0.0680191	0.185374	0.228131	-1.55635	0.0361
Marco	0.31972	0.300098	0.497259	1.72865	2.48289	1.50428	-2.35111	2.29329e-05
Lct	0.150976	0.173422	0.210555	0.112315	0.071741	0.105946	0.873788	0.0289389
Dyrk3	0.94065	1.42625	1.8346	0.679192	0.607365	0.925422	0.920041	0.00736277
Lemd1	0.359681	0.43055	0.585507	0.319507	0.291902	0.170482	0.804522	0.0195914
Lrrn2	1.39405	1.48331	1.74283	3.00205	2.82519	2.08925	-0.782872	0.00164549
Lgr6	0.109086	0.149185	0.190528	0.118147	0.0335406	0.0594387	1.07069	0.046183
Tnnt2	3.60108	4.20185	5.48367	8.56205	6.68729	8.03129	-0.812974	0.00044993
Cacna1s	0.449683	0.508827	0.325496	3.11688	1.81724	2.64568	-2.56337	8.4022e-07
Gm37759	0.297952	0.246419	0.0938297	1.34378	0.693749	1.18482	-2.32732	0.00026036
Kif21b	1.49738	1.96949	1.71055	4.97514	4.70361	4.27431	-1.43772	1.34342e-07
Gm19705	0.931149	0.798622	1.22879	1.41428	1.71086	1.94575	-0.774281	0.0167388
Fam129a	2.44826	2.95046	3.04807	5.80687	4.39646	4.15675	-0.77239	0.000299492
Rgs8	0.0775255	0.0553165	0.0496485	0.17726	0.114417	0.0938715	-1.0753	0.0186322
Rgsl1	0.10108	0.280981	0.516887	0.112011	0.158504	0.0953643	1.27865	0.0394101
Gm9530	0.388566	0.568844	0.358054	0.260407	0.280142	0.179274	0.85442	0.0296883
Sec16b	0.641952	0.550336	0.361915	1.61254	0.993901	1.1207	-1.26281	0.000734055
4930523C07Rik	0.556257	0.67125	1.0072	1.3894	0.964675	1.07401	-0.622209	0.0230528
Gas5	51.1988	41.8139	43.5912	76.6732	69.0337	76.7979	-0.70348	6.17864e-05
Gm22357	53.4954	42.8314	46.6555	151.158	121.815	184.255	-1.67305	3.40899e-06
Snord80	10.8547	5.48612	11.2804	22.2065	23.8297	22.3437	-1.29812	0.00354447
Fmo2	1.30889	1.34683	1.09377	1.82791	1.71244	2.11347	-0.59403	0.00240273
Prrx1	1.86715	1.281	1.57668	2.46663	2.62055	2.04028	-0.593395	0.00574159
Dpt	70.0988	44.5149	61.4796	106.317	93.2208	81.9625	-0.675735	0.0100582
5330438I03Rik	0.309044	0.265532	0.489394	0.569017	0.678456	0.55663	-0.760468	0.040788
Gm4846	0.604975	0.99373	0.424124	0.335199	0.421627	0.259438	0.974029	0.0367698
Gm16701	0.497678	0.670756	0.492568	0.358237	0.250501	0.227653	0.974739	0.015849
Adamts4	1.83706	1.44122	2.21622	2.43071	3.2581	3.04776	-0.668339	0.0045274
Gm20045	0.969566	1.64938	1.10004	0.757936	0.716924	0.965444	0.599465	0.0187264
Cd84	0.217284	0.283403	0.284426	0.616592	0.608172	0.41841	-1.07217	0.00183041
Vangl2	1.61633	1.91355	1.61218	2.52825	2.55099	4.5246	-0.900402	0.00285485
Atp1a4	0.419595	0.714976	2.62224	0.257522	0.263186	0.0370161	2.72954	0.0486931
4933439K11Rik	0.417829	1.37265	4.32739	0.351075	0.233998	0.261094	2.83647	0.0324433
Cadm3	0.448835	0.386254	0.276141	1.0299	0.589684	0.474434	-0.918323	0.0169495
Ifi204	0.308632	0.224621	0.342119	0.505119	0.632381	0.711536	-1.07228	0.00455052
Mndal	0.817176	0.980905	0.871973	2.07666	2.00221	2.98311	-1.40311	2.50451e-05
Rgs7	0.986012	1.21818	0.903601	0.709749	0.717725	0.345791	0.796949	0.017194
Gm37912	0.271544	0.852346	0.650672	0.0584762	0.104584	0.176513	2.35712	0.000835952
Gm37896	0.283521	0.206983	0.498863	0.805593	0.609251	0.486342	-0.940557	0.0341829
D730003I15Rik	1.12054	0.842918	1.00587	0.639737	0.626567	0.536408	0.715994	0.0333566
Stamos	0.811526	1.26563	1.14742	0.735239	0.605977	0.620463	0.705647	0.0308671
Cacna1b	0.238777	0.388862	0.205691	0.126645	0.166411	0.177489	0.813765	0.0202644
Entpd2	2.52035	1.42	1.79929	4.56444	2.65637	2.84914	-0.808073	0.0184361
Npdc1	1.98086	1.34246	1.54837	2.74	2.18844	2.39783	-0.586579	0.0105137
Ptgds	30.1786	31.1521	24.0638	11.1261	13.4611	13.1156	1.17616	2.1413e-06
Ntng2	0.793291	1.00235	0.687003	1.64545	1.25548	1.06595	-0.684267	0.0134403
6530402F18Rik	0.287174	0.217713	0.26054	0.489583	0.408621	0.533659	-0.899162	0.00571396
Hmcn2	0.46497	0.67736	0.535993	1.09112	1.40105	0.937406	-1.04118	0.000189083
Neb	0.501104	0.947864	0.896982	0.416153	0.380355	0.577022	0.765148	0.0159942
Rprm	4.12516	2.92192	1.78809	1.87881	1.41649	0.867732	1.0806	0.0171488
Cytip	0.332449	0.355817	0.658072	0.906832	0.538349	0.771544	-0.720591	0.0378474
Dpp4	0.994857	0.731367	1.14301	1.41615	1.46185	1.43206	-0.586039	0.0100201
Galnt3	0.854305	1.38169	1.79054	0.442074	0.378249	0.662036	1.43567	0.000713536
Metap1d	1.88946	1.91972	3.15514	3.91502	3.25155	4.90656	-0.793005	0.00742738
Rapgef4os2	0.39474	0.525019	0.287875	0.552539	0.716725	0.898078	-0.843847	0.0315994
Gm13652	0.876138	1.17215	1.28796	1.43656	1.64326	2.26761	-0.682251	0.0106661
2600014E21Rik	2.03103	1.95382	1.72723	3.29962	2.93506	2.48122	-0.614194	0.000888309
Ttc30a2	2.40514	3.45484	3.83018	2.14575	1.58799	1.20979	0.959459	0.00288271
Pde11a	0.987615	1.63825	0.910639	0.846176	0.794193	0.417014	0.764955	0.0368464
Fsip2	0.0602868	0.126082	0.366237	0.0489085	0.0434646	0.0620483	1.82974	0.0315646
Fam171b	2.46442	2.32864	1.73465	1.88672	0.896103	1.07916	0.752369	0.0328439
Olfr1033	0.0460089	0.0232536	0.0227683	1.27069	0.853733	0.935227	-4.99181	1.0804e-07
Agbl2	0.17188	0.320753	0.608488	0.182578	0.179683	0.210921	0.932843	0.0469271
Ccdc73	0.757783	0.878334	0.830003	0.40307	0.559811	0.644738	0.613811	0.0247699
Fmn1	0.545343	0.66958	0.986235	0.35339	0.50145	0.496628	0.69966	0.0125149
Ckmt1	0.228966	0.195839	0.226616	0.432386	0.423485	0.344421	-0.878114	0.027351
Catsper2	0.987499	1.53938	3.79169	0.791051	0.621885	1.0286	1.36782	0.0477504
Frmd5	0.873871	1.219	0.974453	1.74605	1.6931	1.42706	-0.674529	0.00153281
Usp50	0.540103	0.80456	1.33639	0.348929	0.638915	0.482741	0.857771	0.0399717
Lrrn4	0.80468	0.885163	1.3586	1.54937	2.06591	1.43716	-0.733906	0.0125822
Ovol2	0.35369	0.651948	1.60615	0.446915	0.239248	0.40685	1.24549	0.0444837
Cst13	0.842175	1.30532	2.72286	0.516876	0.586939	0.462284	1.61784	0.006336
6820408C15Rik	1.47604	1.5169	2.77569	0.855578	0.771527	1.21534	1.01938	0.00833011
Ttll9	0.642234	0.674647	2.69212	0.425079	0.302784	0.557313	1.63881	0.0485361
Spag4	0.200197	0.312746	0.576413	0.0837743	0.161721	0.159218	1.41726	0.00914691
Gm14253	0.550379	0.556339	0.885184	3.37789	3.52411	0.495653	-1.8914	0.0225467
Jph2	2.32464	2.54824	3.34379	3.81516	6.24285	4.41295	-0.821565	0.00344702
Trp53tg5	0.141204	1.42733	6.19578	0.240729	0.147614	0.14533	3.80894	0.0473897
Zfp335os	2.27923	3.35115	2.35837	1.37766	1.94948	1.59943	0.687239	0.0195502
Mmp9	0.397505	1.01708	0.454896	0.190597	0.168817	0.370764	1.34041	0.0112763
Cd40	0.580819	0.678436	0.44711	0.673335	1.17389	0.876758	-0.679419	0.0351849
Gm11469	1.24085	2.77735	4.12294	0.453308	0.741247	0.912219	1.92746	0.00272339
Gm14267	1.74682	5.2972	7.63589	2.45687	0.836971	2.24732	1.39159	0.046937
Bcas1	0.698726	1.25956	1.31395	0.357363	0.572184	0.719142	0.981501	0.0102851
Cbln4	2.75706	5.58915	4.01817	3.06813	1.94788	2.32311	0.739428	0.0186482
Gm2007	0.761492	1.03619	0.869624	1.73761	1.68398	0.934462	-0.716782	0.0467175
Tcfl5	5.38758	9.31982	12.6435	4.37467	5.34185	5.71649	0.818476	0.0386103
9230112E08Rik	0.786901	0.702623	0.558156	0.965904	1.20652	0.998868	-0.632539	0.0218729
Tcea2	5.46268	6.3271	7.94898	4.22408	4.09605	4.16652	0.655839	0.00108851
Car2	0.490075	0.770594	1.68867	0.185666	0.550273	0.467032	1.28557	0.0403436
Bhlhe22	0.815076	0.544839	0.910799	1.12958	1.36058	1.01479	-0.625444	0.0360348
Gm42944	0.839467	0.859722	0.612204	0.497136	0.438788	0.443366	0.738979	0.0116653
Dnajc5b	0.0698356	0.95299	6.98098	0.0357174	0.109509	0.0359381	5.36428	0.0497219
Cp	5.65259	4.70111	5.32165	10.7884	8.25367	7.35969	-0.754946	0.000869219
Cpa3	0.550606	0.0878792	0.487589	1.4525	1.96917	2.62469	-2.39955	0.00191066
Gpr160	0.239204	0.315384	0.60731	0.148937	0.0869786	0.235489	1.29434	0.0171884
B230207O21Rik	1.78037	2.49183	1.62655	3.78237	4.00874	2.53716	-0.813041	0.0464085
Adad1	0.430205	0.761011	1.55679	0.330042	0.421627	0.345918	1.31271	0.0131814
Pcdh10	0.0553393	0.0643293	0.0712025	0.0820794	0.0954551	0.125304	-0.664426	0.0494603
Postn	29.9425	27.6982	25.3801	51.3088	49.1683	33.6044	-0.697307	0.00366486
Sohlh2	2.80803	2.76325	3.33136	1.95927	1.59412	2.04794	0.666395	0.00312555
P2ry13	0.295627	0.140625	0.206536	0.569218	0.381766	0.429551	-1.09204	0.0186556
Plch1	0.183237	0.154351	0.17128	0.0937163	0.0691727	0.0576249	1.19586	0.00455216
Rxfp1	0.139949	0.291771	0.142841	5.00591	2.68374	0.229561	-3.80512	0.0388682
Dclk2	0.566547	0.804281	0.577222	0.298282	0.479039	0.497351	0.605543	0.0221453
Rpl31-ps11	3.73148	4.24338	5.77058	1.43135	2.68186	2.16029	1.12292	0.00802631
Hao2	6.86564	6.37611	9.91667	5.59633	5.22599	3.99684	0.639276	0.0105694
Cd2	0.404012	0.893346	0.649779	0.0774868	0.211177	0.311862	1.67491	0.00704812
Ppm1j	0.411988	0.734911	1.29523	0.247895	0.5827	0.249427	1.16141	0.0417635
Wnt2b	0.617408	0.59236	0.528212	1.2738	0.973625	1.21704	-0.995415	0.000624369
Kcnc4	0.29971	0.387784	0.593267	0.306573	0.175457	0.0493548	1.24931	0.0481068
5330417C22Rik	0.181313	0.324259	0.48314	0.213998	0.116643	0.172256	0.963861	0.0328178
Vcam1	1.5959	1.31259	1.24105	4.07096	2.24864	1.86187	-0.983944	0.0257088
Gpr88	0.464206	0.342413	0.335267	0.885504	0.760709	0.400293	-0.844174	0.0344714
Lrriq3	0.292427	0.367253	1.13139	0.199415	0.231593	0.209768	1.4744	0.0184906
Gm11837	3.64898	4.47889	7.13705	3.24375	3.63299	2.8167	0.64779	0.0322544
Gm136	0.0670657	0.915191	5.67524	0	0.0350551	0.0345126	6.34011	0.0365748
Fam219a	1.08605	1.43193	1.51888	0.73659	0.913222	0.984138	0.610484	0.013622
Dnaic1	0.300241	0.974368	2.06447	0.177804	0.165195	0.292749	2.37564	0.0103584
Gm21541	6.16472	6.02717	2.45057	1.44725	2.3771	1.40419	1.4769	0.00366273
Fam205c	0.610903	2.35132	10.9531	0.144206	0.147378	0.386925	4.33778	0.0314361
AI481877	0.851702	1.56811	1.1967	0.668961	0.437234	0.602654	1.07026	0.00124535
Bspry	2.41116	3.23079	6.36373	1.35746	1.4264	1.75059	1.40016	0.00457756
4933430I17Rik	1.57798	1.89414	2.07424	1.33669	1.13411	1.11656	0.62136	0.0196708
Tnc	2.16074	2.8817	2.97271	3.51205	5.12673	3.95292	-0.658942	0.00268391
Ccdc171	5.63534	6.33341	4.69263	3.12581	1.63942	4.15579	0.901623	0.0418981
L1td1	0.554021	0.686025	0.616874	0.311689	0.333024	0.399146	0.823858	0.0118212
Ube2u	0.371828	0.780621	5.43523	0.2048	0.239205	0.147189	3.44922	0.0411923
Ttc39a	0.726118	0.960519	1.03807	0.641879	0.431084	0.599713	0.697632	0.0124195
Gm12961	3.9356	3.17411	1.98904	1.37046	2.05714	1.76675	0.806835	0.0234213
2610028E06Rik	0.593941	0.510317	0.538856	0.212639	0.175923	0.417718	1.02897	0.0124202
Rpl28-ps3	2.9084	3.27911	2.76782	1.94519	1.40328	1.95721	0.746699	0.041548
Tssk3	0.0686899	1.07622	6.52653	0.105394	0.0359041	0	5.62497	0.047987
Gm26716	6.67368	6.74595	4.19375	8.88528	9.41294	8.6131	-0.61464	0.0292245
Nr0b2	1.94176	2.31609	2.38307	1.27119	1.58333	1.47889	0.609417	0.0305133
Lin28a	0.968122	1.53463	0.979959	1.62048	1.87463	2.0834	-0.686811	0.0067122
C1qc	1.88959	1.51884	1.26182	3.33011	2.49897	2.67118	-0.863914	0.00295467
Hspb7	2.90537	2.68006	3.0641	3.84885	5.47703	3.83995	-0.60975	0.00555185
Tmem82	0.275379	0.70147	1.51539	0.270418	0.299396	0.260751	1.57119	0.0246154
AI507597	0.698541	1.55343	5.3005	0.666901	0.584203	0.527231	2.06851	0.02613
Pramef12	1.70857	2.22792	1.91086	2.06228	2.75065	4.36106	-0.649741	0.025736
Gm13241	11.4413	15.4392	14.3918	18.3332	21.5646	21.6369	-0.582002	0.00166393
Zfp988	0.455316	0.380894	0.528338	0.931484	0.886319	0.743328	-0.908059	0.00717293
Zfp978	9.29102	8.11409	11.0212	5.17117	5.89196	7.59374	0.608856	0.00613941
Gm13161	2.9098	1.5899	2.1794	1.12622	1.2332	1.21412	0.900802	0.0284575
Gm13204	1.3922	2.32743	1.00693	0.657269	0.503795	1.15733	1.01524	0.0387547
Gm13645	0.691812	2.3522	2.36536	0.385993	0.262989	0.647297	2.03061	0.00338671
Ajap1	0.807692	0.758122	0.88505	1.7704	0.995138	1.2024	-0.697117	0.0210094
Ccdc146	0.462647	0.691319	1.92118	0.411514	0.294396	0.383002	1.49008	0.0264463
Asb10	0.31334	0.506772	0.20158	0.929492	0.540481	0.483742	-0.944873	0.0396458
Gm7361	1.3504	1.03861	1.11863	0.585562	0.69051	0.634502	0.874841	0.00341749
Slc30a3	0.0930731	0.439045	1.12076	0.0634696	0.0324328	0.127723	2.84713	0.0193971
Dnajc5g	0.591531	0.652295	3.27324	0.522566	0.421627	0.359754	1.78054	0.0467952
Ppp2r2c	1.13608	1.93728	1.36886	0.939785	0.764234	1.01676	0.697979	0.00827891
Nkx3-2	0.460598	0.43972	0.101304	1.23021	0.882765	0.553066	-1.41299	0.0225291
Cnga1	2.07058	1.88229	3.14962	1.28643	1.53264	1.35874	0.763141	0.0033137
Nipal1	0.350251	0.606933	0.812164	0.204727	0.366152	0.205992	1.17336	0.0101525
Ccdc158	0.474532	0.987979	1.83658	0.44193	0.436842	0.590451	1.15972	0.0450781
P2rx7	0.758465	0.528487	0.728814	1.21271	0.892973	1.1141	-0.672924	0.00905672
Gm43412	0.140402	0.473076	0.972726	0.175532	0.130468	0.112393	1.89657	0.0146661
Dnah10	0.109316	0.182325	0.286714	0.0838646	0.0628535	0.1322	1.04714	0.0215876
Gm6139	1.24608	1.4611	0.7893	1.88642	1.8237	2.56497	-0.843241	0.0245489
Gm15920	3.71814	3.7584	2.27292	2.0135	1.14322	1.57573	1.03195	0.0179894
Ncf1	0.768097	0.958386	0.582036	1.30129	1.44283	1.18581	-0.774243	0.00631855
Lat2	0.369002	0.372998	0.365213	0.703432	0.613699	0.552413	-0.757088	0.0230544
Rsph10b	0.935653	1.06043	1.81	0.507542	0.429785	0.656586	1.25193	0.00187262
Asb4	0.514301	0.610282	0.464758	0.228729	0.198696	0.230143	1.26277	0.00100015
Wnt2	0.155961	0.256181	0.289425	0.678013	0.468744	0.702267	-1.39368	0.00300034
Gm15487	17.301	9.55647	11.1349	17.6005	18.9759	28.7045	-0.771495	0.0195828
Clec5a	0.412139	0.243018	0.339923	1.04223	0.418882	0.730535	-1.13265	0.0111816
Gpnmb	0.128227	0.0545749	0.213744	0.269229	0.458585	0.527894	-1.64887	0.00557271
4921507P07Rik	1.99657	3.0086	4.7938	1.90992	1.77799	1.63632	0.871556	0.0130151
Pde1c	0.372425	0.438463	0.847784	0.259945	0.212988	0.390072	0.942589	0.0387354
Snca	2.24443	2.64686	2.09261	1.26437	1.4622	1.87479	0.598855	0.0103617
Hpgds	0.540539	0.477229	0.494357	1.02185	0.729595	0.640839	-0.665039	0.0140038
Lrrtm4	0.600743	0.368687	0.941411	0.219464	0.358866	0.471083	0.869522	0.0488963
Eva1a	1.05006	0.776272	1.0703	1.53902	1.86778	1.25818	-0.688568	0.0170188
1700003E16Rik	0.415665	1.14045	2.99732	0.506171	0.434535	0.203719	1.97223	0.045404
Actg2	9.57159	7.22075	14.2798	15.9714	23.5837	15.576	-0.829188	0.038048
Gm44386	2.97176	3.52186	2.7384	1.25785	1.39265	1.58203	1.11392	0.00531731
Zfand4	1.83797	2.02302	3.20701	1.36478	1.42327	1.73754	0.640927	0.0165759
C3ar1	0.347199	0.350959	0.252672	0.490942	0.533767	0.441425	-0.627594	0.0437996
C1rl	0.496575	0.531479	0.520388	0.253973	0.381705	0.300638	0.718354	0.0358328
Plekhg6	0.453074	0.660031	0.461611	0.368033	0.20896	0.356592	0.744453	0.0437481
Vwf	0.424181	0.614115	0.425243	0.251938	0.260341	0.380242	0.708307	0.00670331
Gm43126	5.84104	6.42222	6.7953	11.5303	9.32001	10.3359	-0.713443	0.00455293
Tspan11	1.10605	1.11803	1.55218	2.66803	2.55414	2.22577	-0.983644	0.000169063
Gm44958	7.88441	6.94337	0.827639	0.794275	0.874188	0.55328	2.80076	0.0199086
Fam234b	1.04943	1.33724	2.41094	0.813227	0.977391	1.08009	0.73721	0.0393174
Plbd1	3.38936	4.57371	3.37109	2.0836	2.51343	2.25113	0.718874	0.00132325
Bcat1	0.287669	0.286018	0.247376	0.0868298	0.0838097	0.18444	1.20856	0.00476163
Casc1	0.100837	0.171096	0.363565	0.0773599	0.0941208	0.103784	1.19829	0.0206452
4732416N19Rik	0.492814	0.408739	0.562793	0.310215	0.211359	0.325137	0.787676	0.0278969
Gm5586	13.2714	10.3967	1.03987	0.848456	0.924927	1.08135	3.10637	0.0302366
Gm4763	0.321741	0.739148	0.868467	0	0.030577	0.0602076	4.24585	0.000142493
Rasgrp4	0.766891	1.19422	1.44282	0.678445	0.794484	0.782188	0.586274	0.023721
Ggn	0.408214	0.983975	2.57953	0.321201	0.328266	0.45246	1.83909	0.0288204
Zfp14	1.07532	0.907933	0.82638	1.087	1.36219	2.08327	-0.684785	0.0215605
Fxyd7	2.47403	3.33442	2.38584	5.3858	3.71372	3.59096	-0.638595	0.036182
Zfp536	0.109689	0.120519	0.141604	0.0292698	0.0797697	0.0785351	0.979816	0.0379278
EU599041	0.465286	0.421671	0.333472	0.672882	0.5535	0.792631	-0.723374	0.0317738
Izumo2	0.0607204	1.47307	5.34863	0.0621108	0	0	6.32257	0.0262146
Zfp473	0.205858	0.261215	0.199409	0.129927	0.0915758	0.157777	0.80717	0.0186295
Svip	6.06153	5.17877	9.64042	3.73788	5.16229	4.79016	0.608402	0.0479051
4930429H19Rik	0.573312	0.533158	0.998669	0.445694	0.383577	0.28323	0.910643	0.0348964
Xrra1	0.219908	0.747699	3.38347	0.132921	0.177643	0.123454	3.30691	0.0425261
Gm45399	0.865385	1.13718	1.75582	0.53112	0.497569	0.578936	1.21263	0.0080899
Scnn1b	0.300535	0.219403	0.115675	0.78562	0.366541	0.532711	-1.39894	0.00910013
Zg16	5.07114	4.87859	2.1807	2.46842	2.08398	2.2677	0.8266	0.021307
Pycard	1.261	1.34482	1.46561	2.35491	1.85039	2.52425	-0.726237	0.00127544
Gm45205	0.765696	1.02754	1.11062	1.59347	1.09028	2.01094	-0.694218	0.0180375
Fank1	0.478051	1.54633	5.01531	0.508557	0.339832	0.373934	2.50976	0.045035
Lmntd2	0.557783	0.918822	1.53349	0.232448	0.36714	0.403982	1.57289	0.0031007
Cdhr5	0.882762	1.20058	0.508334	0.410443	0.503366	0.39646	0.9715	0.0166395
D630011A20Rik	0.0879231	2.04413	11.0516	0.179873	0	0	5.93564	0.0462071
Gm15816	0.755263	0.526512	0.747509	1.49184	1.08904	1.12579	-0.866148	0.0150918
Letm2	0.692403	0.693762	1.15418	0.528087	0.482558	0.681379	0.58573	0.0344798
Got1l1	0.337794	0.756073	1.52835	0.345529	0.201788	0.198665	1.79088	0.00809219
Triml2	0.309504	0.601646	0.506617	0.669713	0.672	0.882132	-0.655618	0.0430271
Gm45540	1.63362	1.08444	0.941152	0.773164	0.930361	0.690109	0.61202	0.0414295
Pde4c	0.103066	0.0641119	0.149088	0.129755	0.306658	0.228474	-1.06253	0.0362902
Calr3	5.10868	5.79818	8.18311	4.4464	2.50634	3.75897	0.829766	0.006756
Gm5909	14.3107	15.6451	9.2387	8.03881	3.62349	4.48575	1.27186	0.00997665
Mylk3	2.82265	1.99207	1.47303	1.58538	1.12667	1.26769	0.660627	0.0255704
Sall1	0.0918475	0.320727	0.165281	0.341639	0.349153	0.558593	-1.12044	0.0228048
Irx3	0.652579	0.917068	0.378075	0.195372	0.432618	0.245724	1.14139	0.0206753
Ccl17	14.1977	26.0228	14.0519	7.96129	14.574	11.1795	0.674274	0.0487501
Drc7	0.0882762	0.475905	2.25705	0.0300992	0.0153806	0.0605703	4.65598	0.0268671
Tepp	1.24263	1.25609	1.03856	0.790898	0.548485	0.65368	0.820638	0.0161959
RP24-248F14.2	0.206975	0.571858	0.860371	0.183486	0.216371	0.241426	1.33799	0.0165966
Dpep3	0.621364	2.30301	3.9974	0.635593	0.405983	0.746107	1.93802	0.0231315
Cdh1	1.42245	2.30252	1.35078	0.403082	0.592803	1.12769	1.25323	0.011764
Hydin	0.0438714	0.189704	0.282236	0.0349035	0.048411	0.0526788	1.90491	0.0165012
Osgin1	0.476771	0.481933	0.911208	0.336336	0.360921	0.304573	0.892842	0.0278774
Ccdc7b	0.0386985	0.880146	4.8068	0.0197923	0	0.0597439	6.03466	0.0450837
Gm16485	0.198671	0.24545	0.0873918	0.429021	0.276921	0.295355	-0.917079	0.0490585
Ccdc67	0.172606	0.644218	2.90418	0.162977	0.124922	0.163984	3.02144	0.0495231
Ccdc151	0.542087	0.58331	2.19801	0.536613	0.237647	0.30596	1.6109	0.0392347
Cnn1	14.9913	12.5224	15.7915	19.1805	26.5733	20.8701	-0.623297	0.00196739
B3gat1	0.239307	0.232939	0.175444	0.0725293	0.0926559	0.118588	1.18042	0.00841886
Adamts15	0.589661	0.403081	0.69277	1.00672	1.05104	0.768436	-0.746388	0.0077367
St14	0.512319	0.86699	0.603912	0.282634	0.361063	0.308078	1.04695	0.0011898
Gm28119	12.3918	13.5699	17.2289	6.1869	9.87002	11.2356	0.660256	0.0275367
Mir125b-1	41.6778	43.2834	54.2465	14.0161	27.455	34.669	0.869997	0.0193517
Gm10080	2.20811	3.55095	5.46361	4.31202	10.1778	6.40469	-0.902409	0.0466203
Mpzl2	0.227126	0.41453	0.156107	0.43884	0.428706	0.720768	-0.998546	0.0188817
Mpzl3	0.201341	0.330722	0.242865	0.347543	0.34861	0.505108	-0.636538	0.0403161
Il10ra	1.13109	1.00359	0.97021	2.134	1.48461	1.62979	-0.758869	0.00333338
Gm16759	0.129574	0.225572	0.370481	0.139904	0.11288	0.103724	1.01132	0.0322227
Cilp	4.88002	3.67875	2.56845	8.40774	8.31166	4.6076	-0.942837	0.0446727
Bmp5	1.93322	1.6671	1.82689	0.793228	1.00478	1.18033	0.86612	0.00091116
Rasgrf1	0.0397374	0.144604	0.0943907	0.0325179	0.0207707	0.0572579	1.31055	0.031814
Ctsh	7.76826	7.14123	10.2417	5.74721	5.78169	3.87191	0.702264	0.00999112
Paqr9	0.099829	0.169954	0.286012	0.0322468	0.0549269	0.0648921	1.85254	0.00220382
Faiml	1.10179	1.33647	3.59859	0.619862	0.863859	1.02059	1.26169	0.0244389
D030055H07Rik	0.212703	0.215007	0.353673	0.0957325	0.151205	0.166378	0.913454	0.0309354
Cacna2d2	0.54212	0.564766	0.591305	0.905362	0.936842	0.836941	-0.661561	0.00169404
Gm7628	0.699885	0.88433	0.692699	0.357956	0.52588	0.382678	0.835198	0.0220811
Mir6236	8.22045	20.9543	10.6122	4.38714	4.48364	9.5642	1.09498	0.0315116
Prss42	0.360795	0.757459	1.15368	0.085167	0.116054	0.0571288	3.07744	0.000219208
Dclk3	1.1411	1.81891	1.37553	0.703329	0.351753	0.993757	1.07593	0.0102553
RP23-280C13.3	1.55491	1.71463	1.6089	3.25333	1.84716	3.63714	-0.838339	0.0257646
Ttc21a	0.163183	0.255673	0.767162	0.0667679	0.0852957	0.167951	1.88069	0.0180798
Nudt11	0.839845	0.819666	0.716571	1.30343	1.40778	0.9389	-0.6243	0.0248769
Gm5751	1.38617	1.10093	1.27395	2.43071	1.55261	3.26098	-0.935767	0.0330709
Fthl17c	1.18955	1.09787	0.66545	2.06325	2.05456	1.33077	-0.885623	0.0299894
Fthl17e	0.940913	1.2153	0.931252	1.87145	2.51372	2.25961	-1.10688	0.0033484
Fthl17f	0.415221	0.8919	0.873286	1.53964	1.79054	1.54916	-1.16471	0.00889029
Cybb	0.355749	0.290742	0.41952	0.619397	0.45894	0.701127	-0.735661	0.0155645
Gm9	0.645702	0.815868	1.49117	1.32097	1.68754	2.43675	-0.877868	0.049425
Rhox3a	1.29421	1.77244	1.98337	0.384343	0.261865	0.64453	1.95252	0.000442077
Rhox4a	0.979484	1.33953	1.15951	0.530424	0.522014	0.849969	0.865327	0.0107482
Rhox3b-ps	0.962292	1.84303	1.65419	0.0518067	0.211785	0.521268	2.4748	0.00167845
Rhox2c	1.22434	1.46965	1.28751	0.665326	0.439974	1.06322	0.871721	0.0335239
Rhox4d	0.255248	0.714495	0.505254	0.20084	0.123155	0.262706	1.30762	0.0166583
Rhox4e	1.41565	1.37296	1.24964	0.665326	0.699959	0.964776	0.791765	0.0079116
Rhox3f	1.48283	2.38059	2.28774	0.178445	0.0455926	0.538643	2.98165	0.000579801
Rhox4g	0.550706	0.806211	0.751796	0.252521	0.158816	0.469073	1.25161	0.0102633
Rhox3h	0.834977	1.05502	1.15697	0.256229	0.0872883	0.472656	1.87834	0.00367386
Rhox2-ps	5.46106	4.83017	7.02649	1.25687	1.99814	3.23186	1.41339	0.00356478
Rhox7a	1.57389	1.66325	1.91176	0.768374	0.635699	1.54624	0.803756	0.0437045
Rhox7b	1.20884	1.99582	1.75476	0.329739	0.547612	1.11975	1.30419	0.0116241
Rhox9	0.406397	0.642988	0.647057	0.0903702	0.184716	0.236414	1.71288	0.00177655
Frmd7	1.29299	1.20326	1.2594	2.6032	1.93098	1.35189	-0.653539	0.0317107
1700013H16Rik	6.78818	6.71647	10.6998	4.40865	3.07884	4.39892	1.024	0.00100004
1700019B21Rik	2.9383	4.45518	5.70442	1.84959	3.54426	1.86102	0.840405	0.0315061
3830417A13Rik	0.472705	0.779607	0.738713	0.254489	0.338113	0.230455	1.25569	0.00625237
Gm14692	3.93518	4.6597	2.83762	2.41517	2.76214	1.27291	0.81282	0.0330155
Xlr3a	1.06508	1.27435	0.978845	1.58973	2.57906	1.61074	-0.807953	0.00446277
Xlr5b	2.31907	1.75814	2.5697	3.97081	3.66288	2.9576	-0.673316	0.0099159
Xlr3b	1.83755	1.99852	1.53091	6.20989	6.61396	3.7705	-1.63679	4.9775e-05
Atp2b3	1.00327	0.977258	1.21865	0.727701	0.619756	0.704036	0.637985	0.00699076
L1cam	0.185492	0.199597	0.195432	0.0979299	0.137615	0.104693	0.762349	0.0301928
Mageb10-ps	9.43595	12.349	12.0295	14.3821	17.8995	18.7158	-0.597572	0.00115476
Gm41	0.81649	0.738455	1.14836	1.40663	1.52742	1.50378	-0.713084	0.0417015
Tbx22	0.150499	0.128108	0.0862364	0.550962	0.149051	0.236421	-1.35776	0.0202358
Gm15020	3.93995	4.05248	5.74663	2.75748	2.31232	3.48594	0.681399	0.0275849
Irs4	0.0279387	0.162387	0.200476	0.00714461	0.0146035	0.0215663	3.08737	0.00241184
Chrdl1	0.748088	0.743038	0.92068	1.39735	0.836453	2.03534	-0.819687	0.0195373
Gm15127	1.20325	1.08596	0.956969	1.5385	1.61727	1.76915	-0.601021	0.0199453
Magea8	1.09503	1.0529	0.925186	1.77578	1.59147	1.40191	-0.636676	0.0254486
Rai2	0.786661	0.536284	0.706158	0.430407	0.401624	0.357751	0.767013	0.0298336
Bmx	0.398099	0.388038	0.464371	0.319955	0.17836	0.190232	0.85099	0.0342266
Egfl6	25.0047	17.7323	21.0471	40.5778	48.4727	28.9481	-0.890104	0.00813791
Gm4064	3.35133	4.32704	3.958	5.27174	8.36123	6.26082	-0.780394	0.00210652
Rbmy	0.967307	1.02924	0.982569	1.43211	2.55466	1.67675	-0.930224	0.00647201
Gm10256	2.46975	3.09565	2.90883	3.46103	5.80921	3.5841	-0.608974	0.0204688
Gm21693	2.25944	2.28391	2.29146	2.45385	4.34495	4.2777	-0.696911	0.0127085
