# Supplementary material for: Sertoli cell-only phenotype and scRNA-seq reveal hnRNPU as a regulator required for spermatogonial stem cell pool establishment in mice
Source: Research Square preprint supplement (doi:10.21203/rs.3.rs-2254778/v1), 2022-11-11
Supplement: Supplementary file 4 [file c5e9cba81929b3389b840538.xlsx]

## Sheet: Sheet1
Table S4. Antibodies used in this study.
Antibodies	Species	Concentration	Application	Company	Cat No.
PLZF	Mouse	1:100	IF	Santa	SC-28391
SCP3	Rabbit	1:200	IF	Abcam	ab15093
γ-H2AX	Mouse	1:200	IF	Abcam	ab26350
DDX4	Rabbit	1:600	IF	Abcam	ab13840
STRA8	Rabbit	1:200	IF	Millipore	ABN1656
TRA98	Rat	1:600	IF	Abcam	ab82527
WT1	Rabbit	1:600	IF	Abcam	Ab89901
KI67	Rabbit	1:400	IF	Abcam	ab15580
hnRNPU	Mouse	1:100	IF/IP	Santa	sc-32315
hnRNPU	Rabbit	1:200	IF/IP	Abclonal	A3917
FOXO1	Rabbit	1:400	IF	CST	C29H4
DNMT3L	Rabbit	1:400	IF	Abcam	Ab194094
E-cadherin	Rabbit	1:200	IF	Proteintech	20874-1-AP
DDX5	Rabbit	1:1000	WB	Huabio	ET1705-32
TRIM28	Rabbit	1:1000	WB	Huabio	R1210-2
SRSF3	Rabbit	1:1000	WB	Abclonal	A9054
GAPDH	Rabbit	1:4000	WB	Proteintech	10494-1-AP
IFKine™ Green Donkey Anti-Mouse IgG	Donkey	1:500	IF	Abbkine	A24211
IFKine™ Red Donkey Anti-Mouse IgG	Donkey	1:500	IF	Abbkine	A24411
IFKine™ Green Donkey Anti-Rabbit IgG	Donkey	1:500	IF	Proteintech	A24221
IFKine™ Red Donkey Anti-Rabbit IgG	Donkey	1:500	IF	Abbkine	A24421
IFKine™ Green Donkey Anti-Goat IgG	Donkey	1:500	IF	Abbkine	A24231
HRP Goat anti-rabbit IgG	Goat	1:8000	WB	Abbkine	A21020
HRP Goat anti-mouse IgG	Goat	1:8000	WB	Abbkine	A21010
